# Supplementary material for: Anti-Pulmonary Fibrosis Activities of Triterpenoids from Oenothera biennis
Source: MDPI journal article supplement (doi:10.3390/molecules27154870), 2022-07-29
Supplement: s1 [file s1]

# Supplementary Information

## Anti-pulmonary fibrosis activities triterpenoids from the *Oenothera biennis*

Juan-Juan Liu<sup>1,2</sup>, Jing-Ke Zhang<sup>1,2</sup>, Meng-Nan Zeng<sup>1,2</sup>, Meng Li<sup>1,2</sup>, Shuang-shuang Xie<sup>1,2</sup>, Xiao-ke Zheng<sup>1,2</sup> and Wei-Sheng Feng<sup>1,2\*</sup>

1. Henan University of Chinese Medicine, Zhengzhou 450046, China

2. The Engineering and Technology Center for Chinese Medicine Development of Henan Province, Zhengzhou 450046, China

\* Correspondence: Wei-Sheng Feng [fwsh@hactcm.edu.cn](mailto:fwsh@hactcm.edu.cn)

### Abstract:

Five new triterpenoids, oenotheralanosterols C-G (1–5), with seven known triterpenoid compounds, namely 2 $\alpha$ ,3 $\alpha$ ,19 $\alpha$ -trihydroxy-24-norurs4,12-dien-28-oic acid (6), 3 $\beta$ ,23-dihydroxy-1-oxo-olean-12-en-28-oic acid (7), reimagine C (8), knoxivalic acid A (9), termichebulolide (10), rosasecotriterpene A (11), rosanortriterpene C (12), were extracted and separated from the dichloromethane part of *Oenothera biennis* L. The anti-pulmonary fibrosis activities of all the compounds against TGF- $\beta$ 1 induced damage on normal human lung epithelial (BEAS-2B) cells were investigated in vitro. The results showed that compounds 1–2, 6, 8, and 11 exhibited significant anti-pulmonary fibrosis activities, with EC<sub>50</sub> values ranging from 4.7  $\mu$ M to 9.9  $\mu$ M.

Keywords: *Oenothera biennis* L.; Triterpenoids; Anti-pulmonary fibrosis activities; BEAS-2B cells; RTCA

## Contents

Figure 1. Structures of **1–12**

Figure 2. Key <sup>1</sup>H-<sup>1</sup>H COSY and HMBC correlations of compound **1–5**

Figure 3. Key NOESY correlations of compound **1–5**

Figure S1. <sup>1</sup>H NMR spectrum (500 MHz, CD<sub>3</sub>OD) of **1**

Figure S2. <sup>13</sup>C NMR spectrum (125 MHz, CD<sub>3</sub>OD) of **1**

Figure S3. DEPT 135 spectrum (125 MHz, CD<sub>3</sub>OD) of **1**

Figure S4. <sup>1</sup>H-<sup>1</sup>H COSY spectrum of **1**

Figure S5. HSQC spectrum of **1**

Figure S6. HMBC spectrum of **1**

Figure S7. NOESY spectrum of **1**

Figure S8. HR-ESI-MS Spectrum of **1**

Figure S9. UV spectrum of **1**

Figure S10. IR spectrum of **1**

Figure S11. <sup>1</sup>H NMR spectrum (500 MHz, CD<sub>3</sub>OD) of **2**

Figure S12. <sup>13</sup>C NMR spectrum (125 MHz, CD<sub>3</sub>OD) of **2**

Figure S13. DEPT 135 spectrum (125 MHz, CD<sub>3</sub>OD) of **2**

Figure S14.  $^1\text{H}$ - $^1\text{H}$  COSY spectrum of **2**  
Figure S15. HSQC spectrum of **2**  
Figure S16. HMBC spectrum of **2**  
Figure S17. NOESY spectrum of **2**  
Figure S18. HR-ESI-MS Spectrum of **2**  
Figure S19. UV spectrum of **2**  
Figure S20. IR spectrum of **2**  
Figure S21.  $^1\text{H}$  NMR spectrum (500 MHz,  $\text{CD}_3\text{OD}$ ) of **3**  
Figure S22.  $^{13}\text{C}$  NMR spectrum (125 MHz,  $\text{CD}_3\text{OD}$ ) of **3**  
Figure S23. DEPT 135 spectrum (125 MHz,  $\text{CD}_3\text{OD}$ ) of **3**  
Figure S24.  $^1\text{H}$ - $^1\text{H}$  COSY spectrum of **3**  
Figure S25. HSQC spectrum of **3**  
Figure S26. HMBC spectrum of **3**  
Figure S27. NOESY spectrum of **3**  
Figure S28. HR-ESI-MS Spectrum of **3**  
Figure S29. UV spectrum of **3**  
Figure S30. IR spectrum of **3**  
Figure S31.  $^1\text{H}$  NMR spectrum (500 MHz,  $\text{CD}_3\text{OD}$ ) of **4**  
Figure S32.  $^{13}\text{C}$  NMR spectrum (125 MHz,  $\text{CD}_3\text{OD}$ ) of **4**  
Figure S33. DEPT 135 spectrum (125 MHz,  $\text{CD}_3\text{OD}$ ) of **4**  
Figure S34.  $^1\text{H}$ - $^1\text{H}$  COSY spectrum of **4**  
Figure S35. HSQC spectrum of **4**  
Figure S36. HMBC spectrum of **4**  
Figure S37. NOESY spectrum of **4**  
Figure S38. HR-ESI-MS Spectrum of **4**  
Figure S39. UV spectrum of **4**  
Figure S40. IR spectrum of **4**  
Figure S41.  $^1\text{H}$  NMR spectrum (500 MHz,  $\text{CD}_3\text{OD}$ ) of **5**  
Figure S42.  $^{13}\text{C}$  NMR spectrum (125 MHz,  $\text{CD}_3\text{OD}$ ) of **5**  
Figure S43. DEPT 135 spectrum (125 MHz,  $\text{CD}_3\text{OD}$ ) of **5**  
Figure S44.  $^1\text{H}$ - $^1\text{H}$  COSY spectrum of **5**  
Figure S45. HSQC spectrum of **5**  
Figure S46. HMBC spectrum of **5**  
Figure S47. NOESY spectrum of **5**  
Figure S48. HR-ESI-MS Spectrum of **5**  
Figure S49. UV spectrum of **5**  
Figure S50. IR spectrum of **5**  
Figure S51.  $^1\text{H}$  NMR spectrum (500 MHz,  $\text{CD}_3\text{OD}$ ) of **6**  
Figure S52.  $^{13}\text{C}$  NMR spectrum (125 MHz,  $\text{CD}_3\text{OD}$ ) of **6**  
Figure S53. HR-ESI-MS Spectrum of **6**  
Figure S54.  $^1\text{H}$  NMR spectrum (500 MHz,  $\text{CD}_3\text{OD}$ ) of **7**  
Figure S55.  $^{13}\text{C}$  NMR spectrum (125 MHz,  $\text{CD}_3\text{OD}$ ) of **7**  
Figure S56. HR-ESI-MS Spectrum of **7**  
Figure S57.  $^1\text{H}$  NMR spectrum (500 MHz,  $\text{CD}_3\text{OD}$ ) of **8**

Figure S58.  $^{13}\text{C}$  NMR spectrum (125 MHz,  $\text{CD}_3\text{OD}$ ) of **8**  
Figure S59. HR-ESI-MS Spectrum of **8**  
Figure S60.  $^1\text{H}$  NMR spectrum (500 MHz, Acetone- $d_6$ ) of **9**  
Figure S61.  $^{13}\text{C}$  NMR spectrum (125 MHz, Acetone- $d_6$ ) of **9**  
Figure S62. HR-ESI-MS Spectrum of **9**  
Figure S63.  $^1\text{H}$  NMR spectrum (500 MHz,  $\text{CD}_3\text{OD}$ ) of **10**  
Figure S64.  $^{13}\text{C}$  NMR spectrum (125 MHz,  $\text{CD}_3\text{OD}$ ) of **10**  
Figure S65. HR-ESI-MS Spectrum of **10**  
Figure S66.  $^1\text{H}$  NMR spectrum (500 MHz,  $\text{CD}_3\text{OD}$ ) of **11**  
Figure S67.  $^{13}\text{C}$  NMR spectrum (125 MHz,  $\text{CD}_3\text{OD}$ ) of **11**  
Figure S68. HR-ESI-MS Spectrum of **11**  
Figure S69.  $^1\text{H}$  NMR spectrum (500 MHz,  $\text{CD}_3\text{OD}$ ) of **12**  
Figure S70.  $^{13}\text{C}$  NMR spectrum (125 MHz,  $\text{CD}_3\text{OD}$ ) of **12**  
Figure S71. HR-ESI-MS Spectrum of **12**  
Table 4 Melting points of compounds **6-12**  
Figure S72. The curve obtained with compound **1**  
Figure S73. The curve obtained with compound **2**  
Figure S74. The curve obtained with compound **3**  
Figure S75. The curve obtained with compound **6**  
Figure S76. The curve obtained with compound **7**  
Figure S77. The curve obtained with compound **8**  
Figure S78. The curve obtained with compound **11**  
Figure S79. The curve obtained with positive control compound Pirfenidone

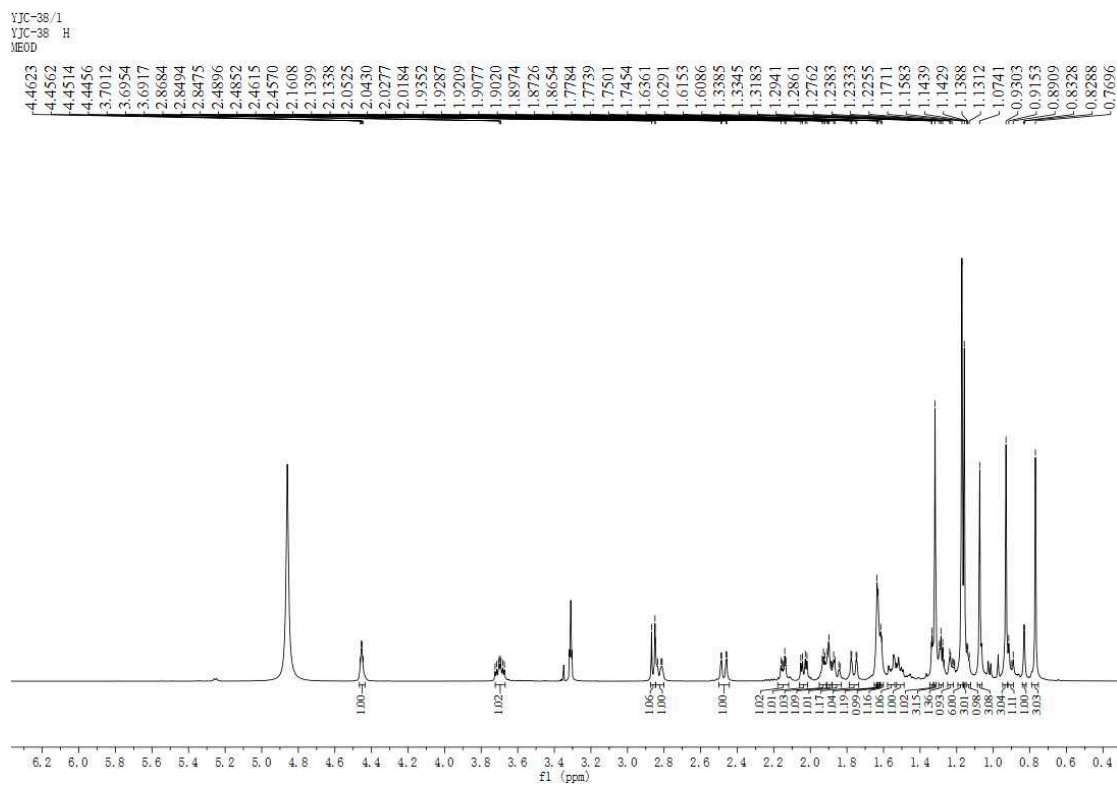

Figure S1.  $^1\text{H}$  NMR spectrum (500 MHz,  $\text{CD}_3\text{OD}$ ) of **1**

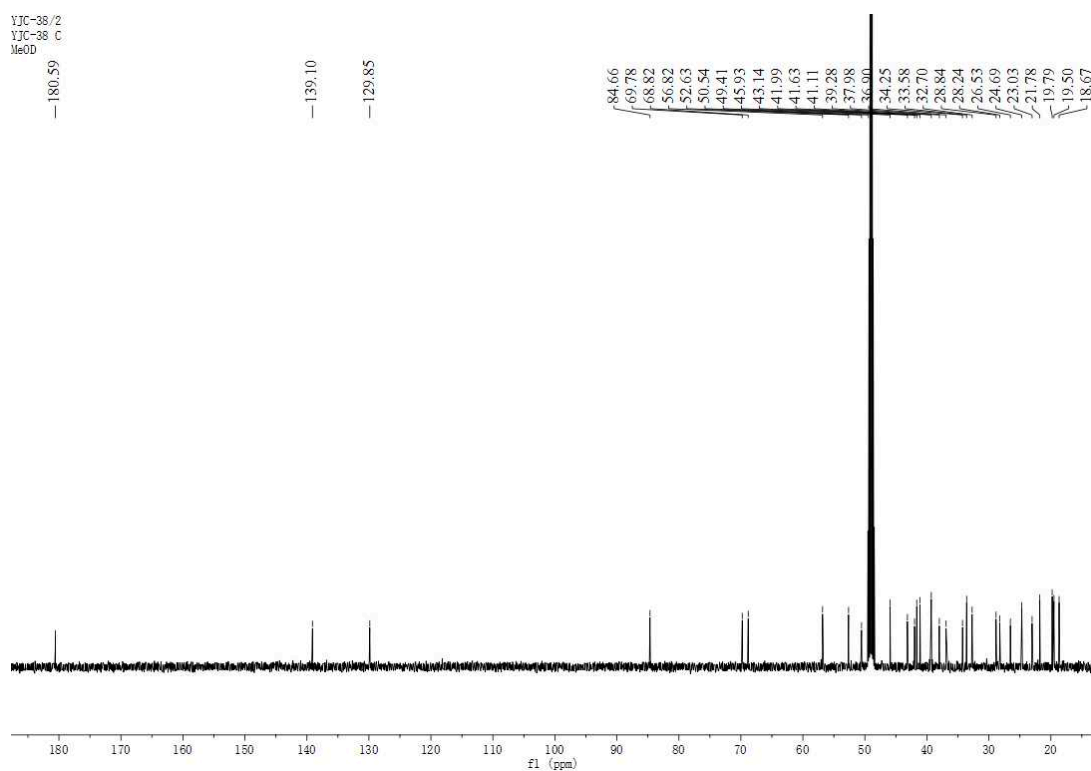

Figure S2.  $^{13}\text{C}$  NMR spectrum (125 MHz,  $\text{CD}_3\text{OD}$ ) of **1**

YJC-38.3.fid  
YJC-38 DEPT135  
MEOD

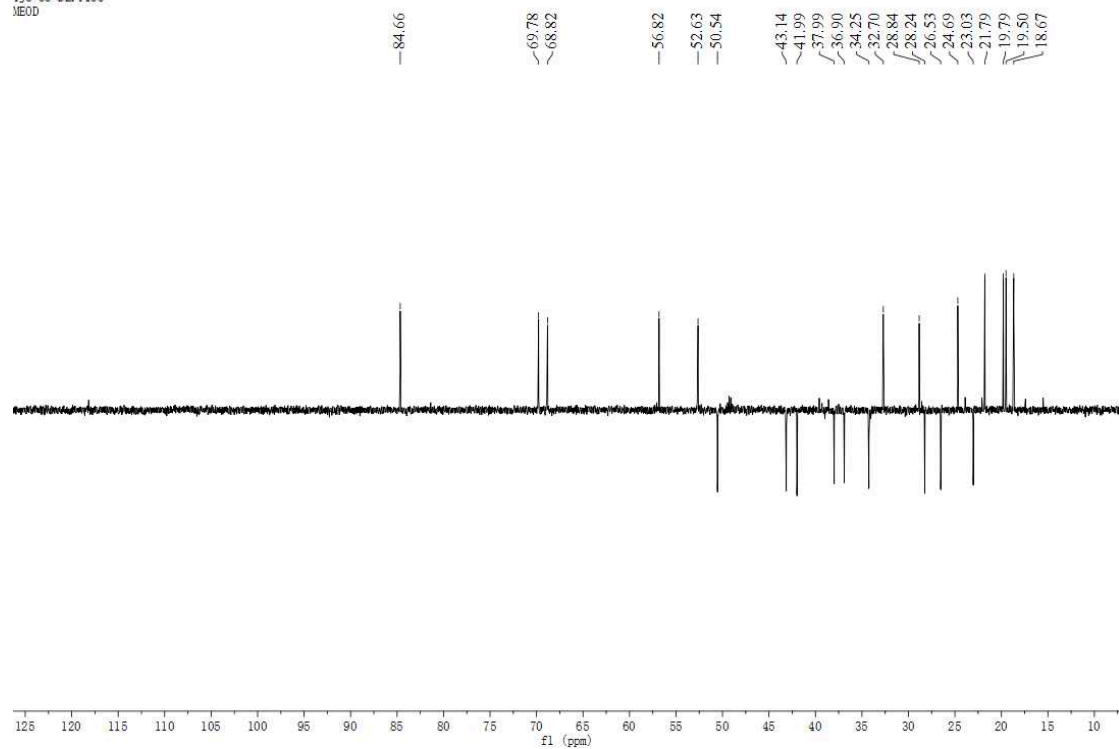

Figure S3. DEPT 135 spectrum (125 MHz, CD<sub>3</sub>OD) of **1**

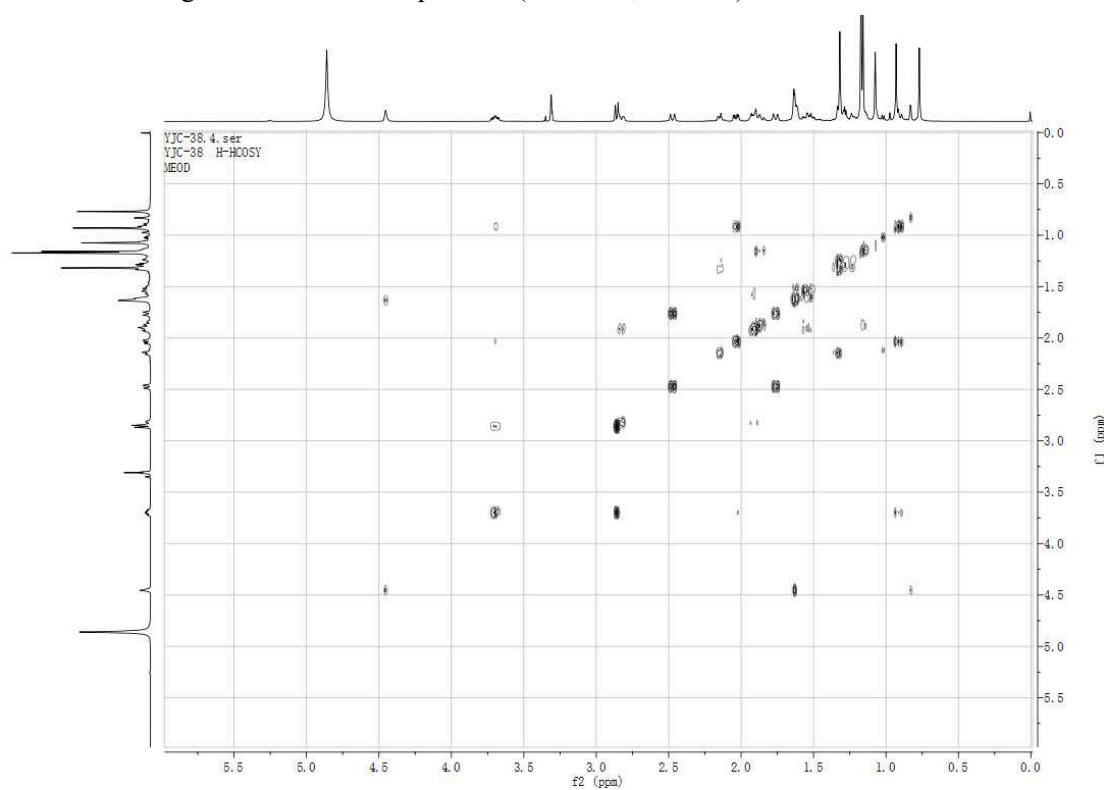

Figure S4. <sup>1</sup>H-<sup>1</sup>H COSY spectrum of **1**

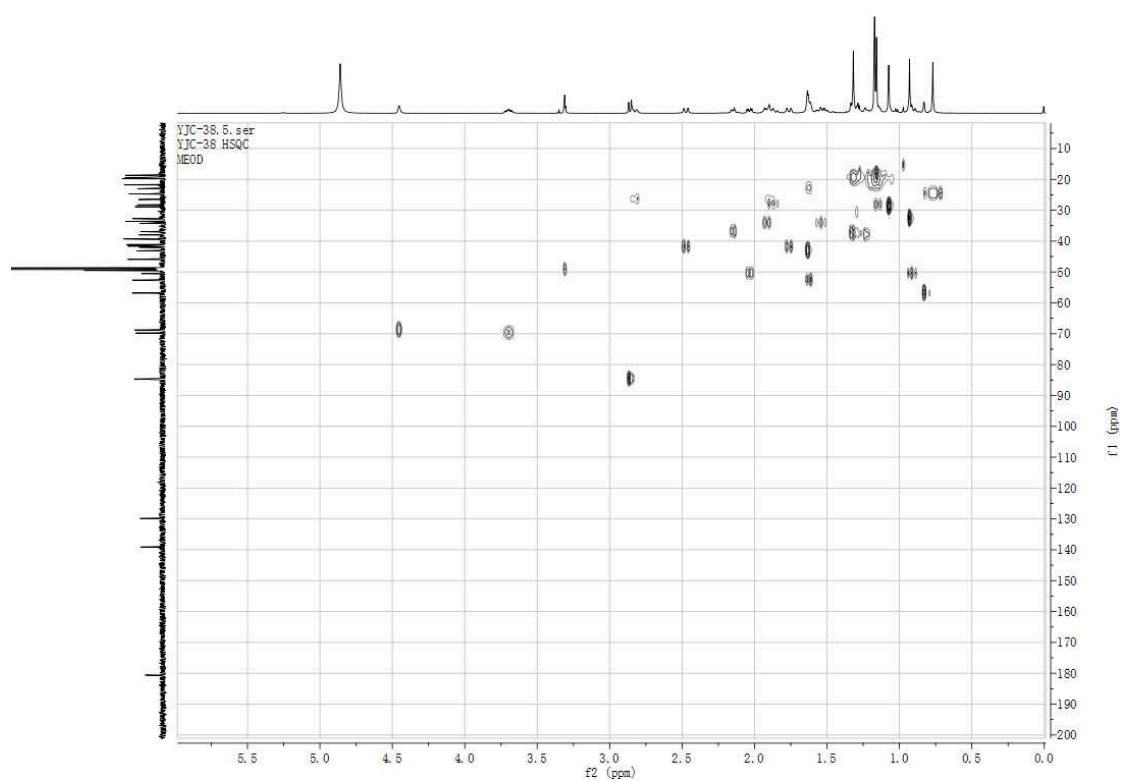

Figure S5. HSQC spectrum of **1**

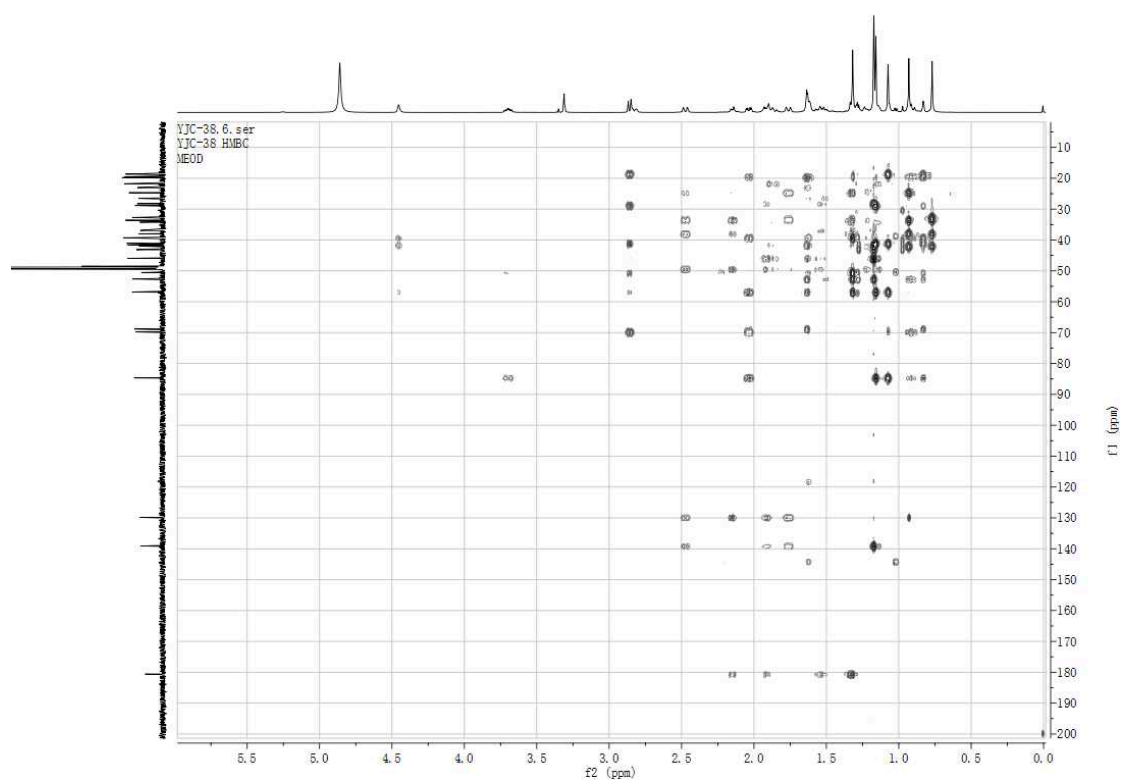

Figure S6. HMBC spectrum of **1**

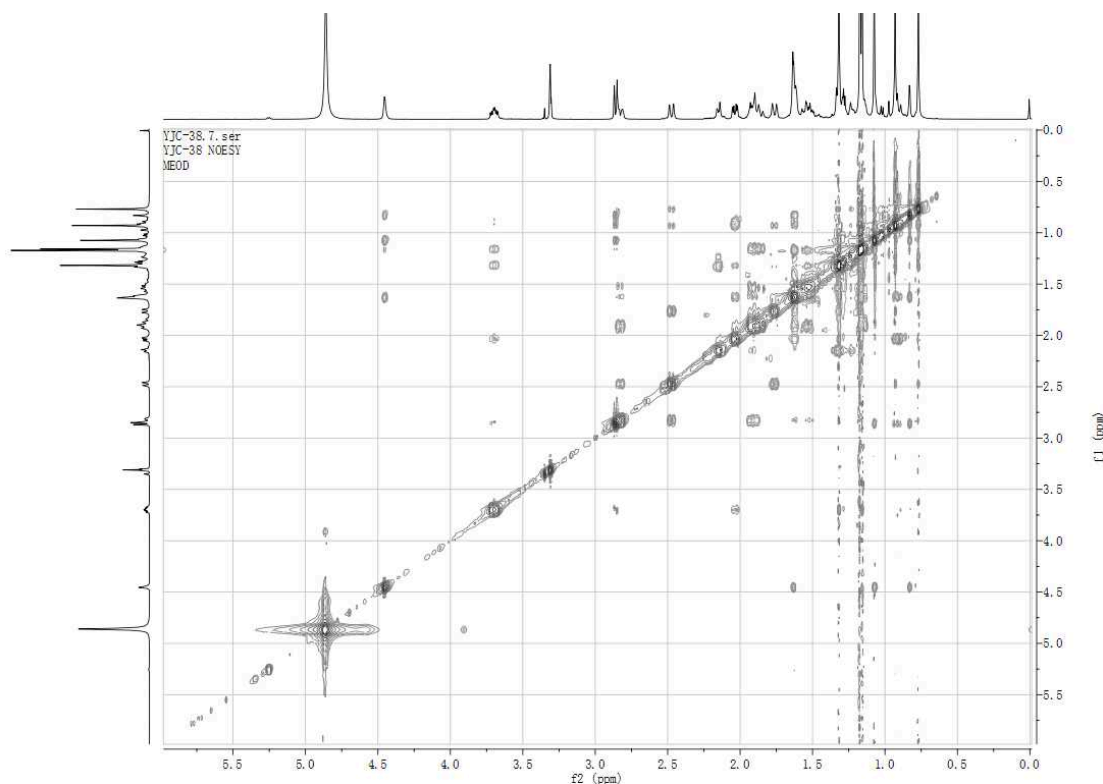

Figure S7. NOESY spectrum of **1**

### Display Report

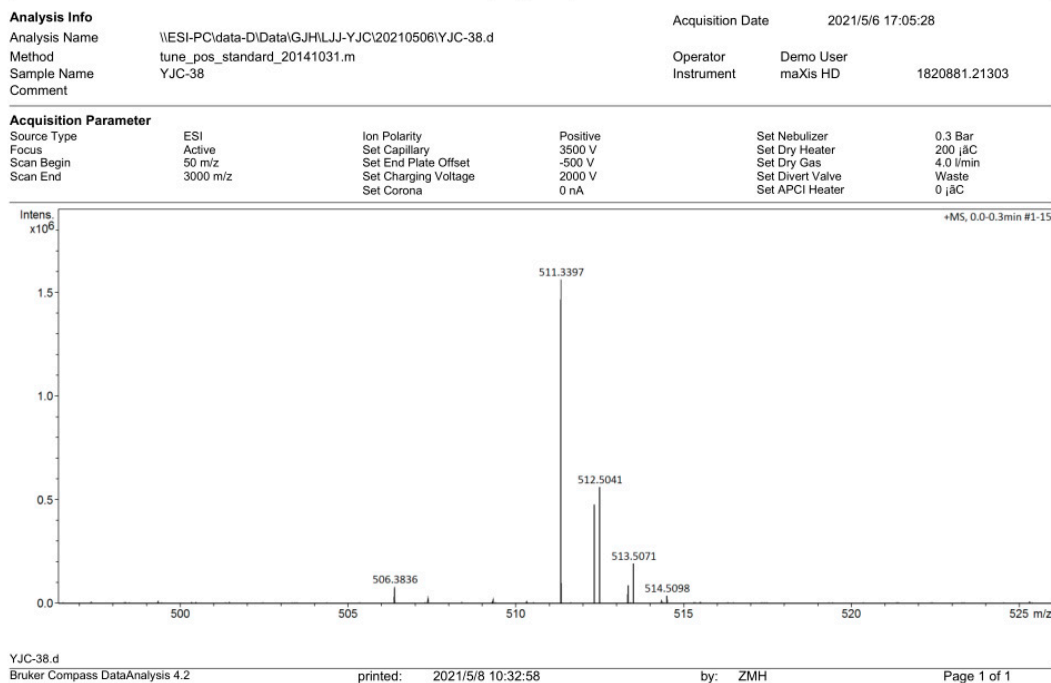

Figure S8. HR-ESI-MS Spectrum of **1**

Thermo Scientific ~ VISIONpro SOFTWARE V4.41

|               |                |                |            |
|---------------|----------------|----------------|------------|
| Operator Name | (None Entered) | Date of Report | 2021/10/9  |
| Department    | (None Entered) | Time of Report | 22:07:01下午 |
| Organization  | (None Entered) |                |            |
| Information   | (None Entered) |                |            |

Scan Graph

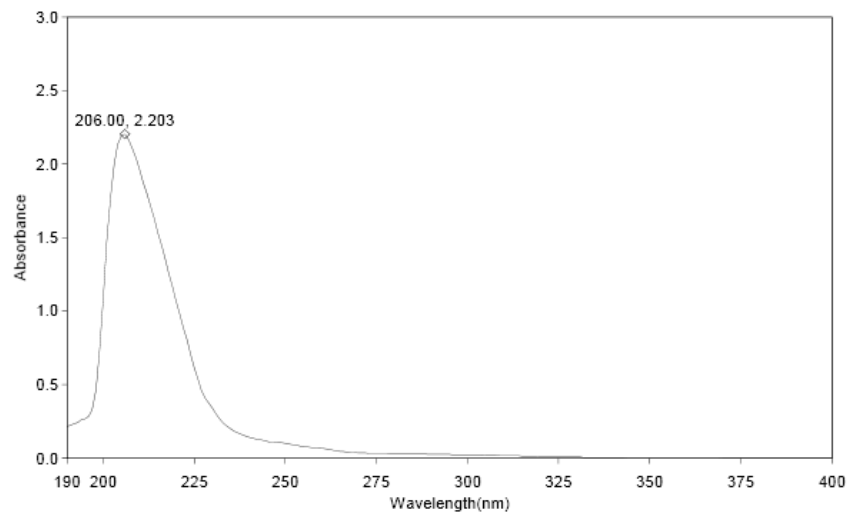

Results Table - scan021,YJC-38,Cycle01

| nm     | A     | Peak Pick Method             |
|--------|-------|------------------------------|
| 206.00 | 2.203 | Find 8 Peaks Above -3.0000 A |
|        |       | Start Wavelength 190.00 nm   |
|        |       | Stop Wavelength 400.00 nm    |
|        |       | Sort By Wavelength           |

Sensitivity      Auto

Figure S9. UV spectrum of **1**

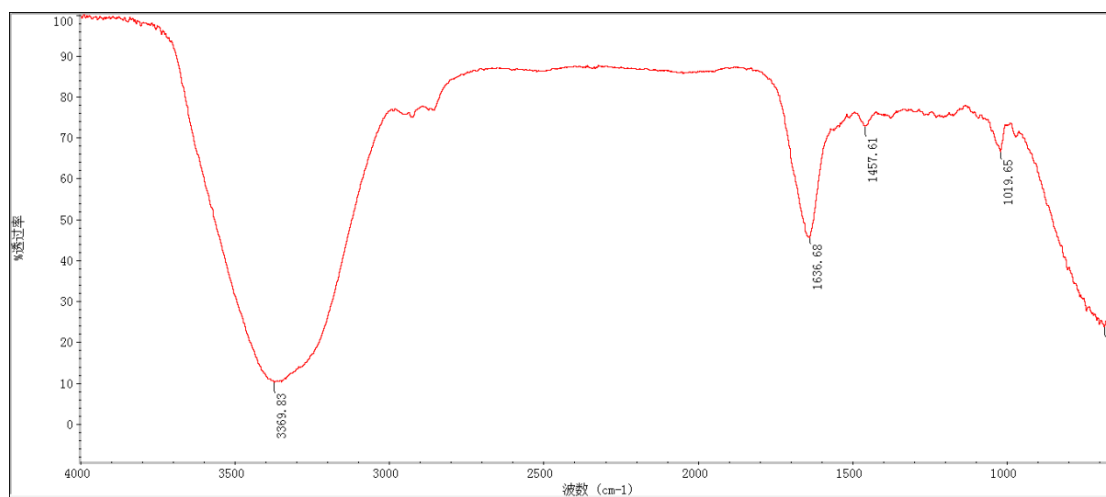

Figure S10. IR spectrum of **1**



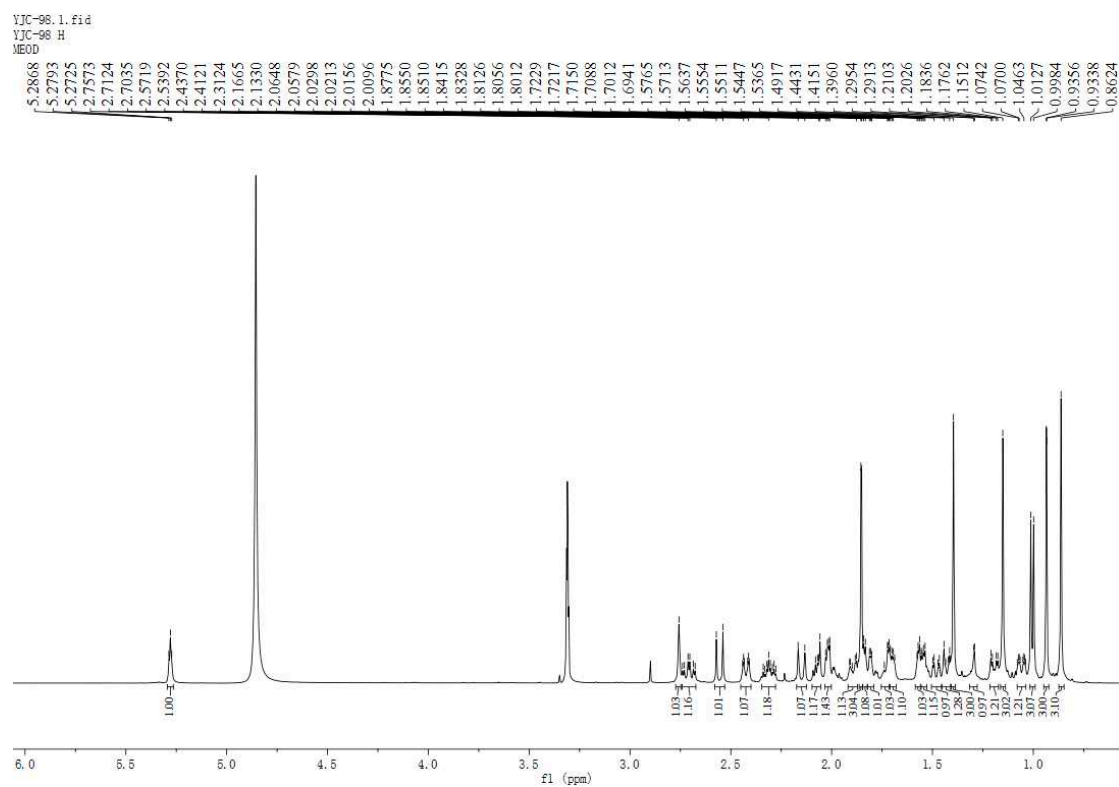

Figure S11.  $^1\text{H}$  NMR spectrum (500 MHz,  $\text{CD}_3\text{OD}$ ) of **2**

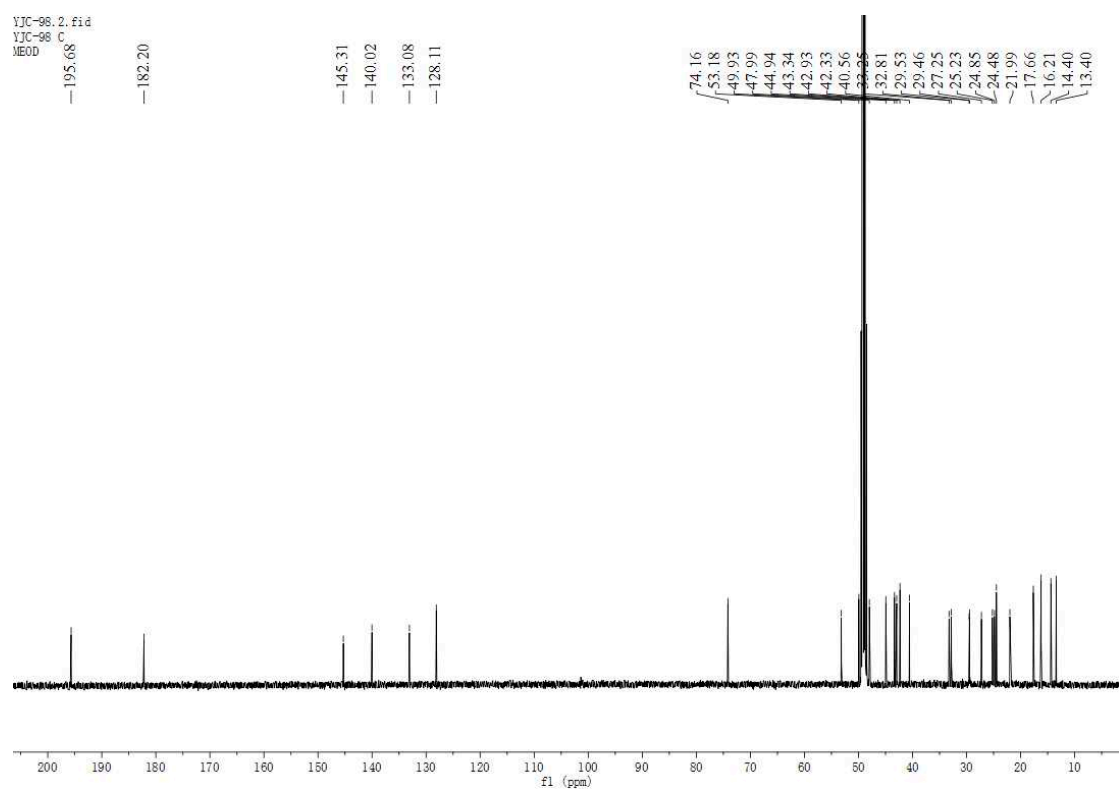

Figure S12.  $^{13}\text{C}$  NMR spectrum (125 MHz,  $\text{CD}_3\text{OD}$ ) of **2**

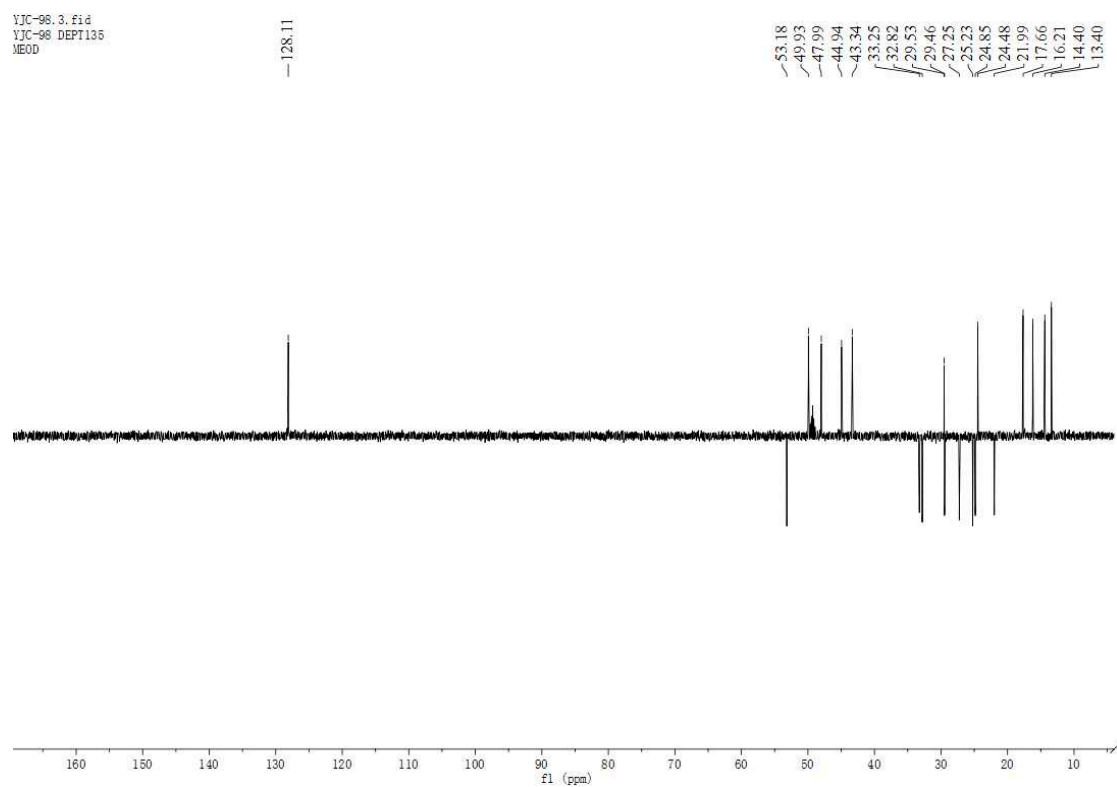

Figure S13. DEPT 135 spectrum (125 MHz, CD<sub>3</sub>OD) of **2**

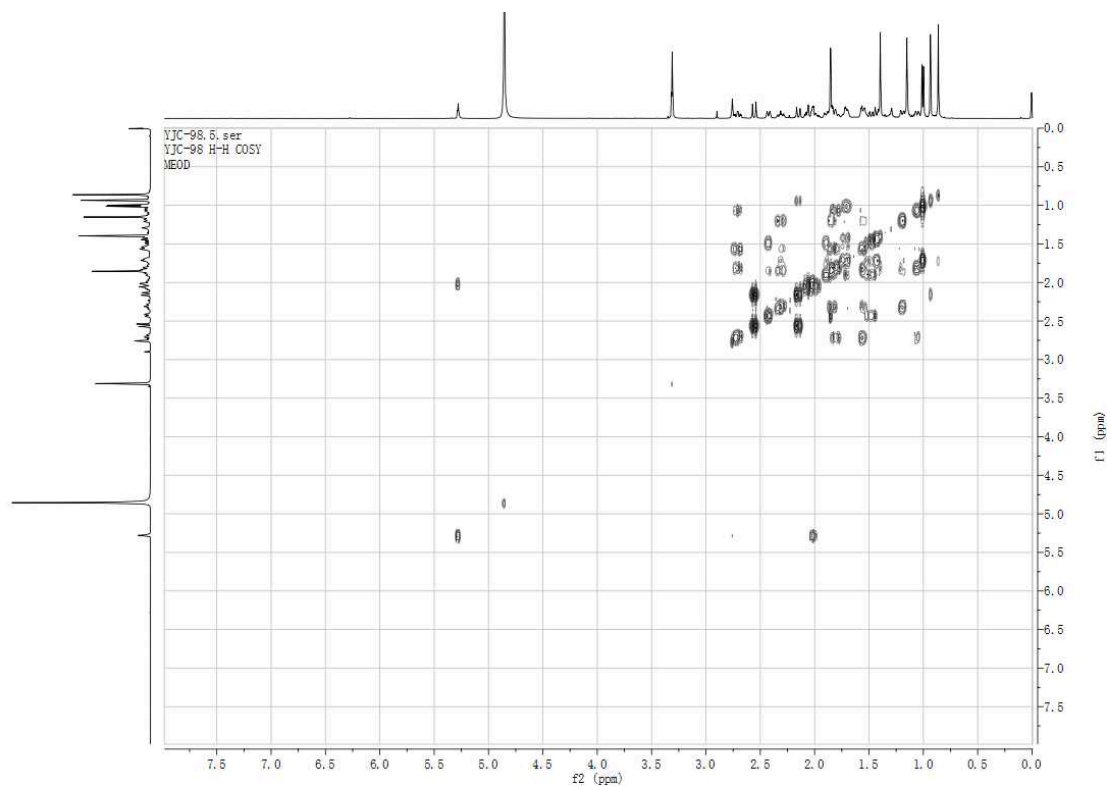

Figure S14. <sup>1</sup>H-<sup>1</sup>H COSY spectrum of **2**

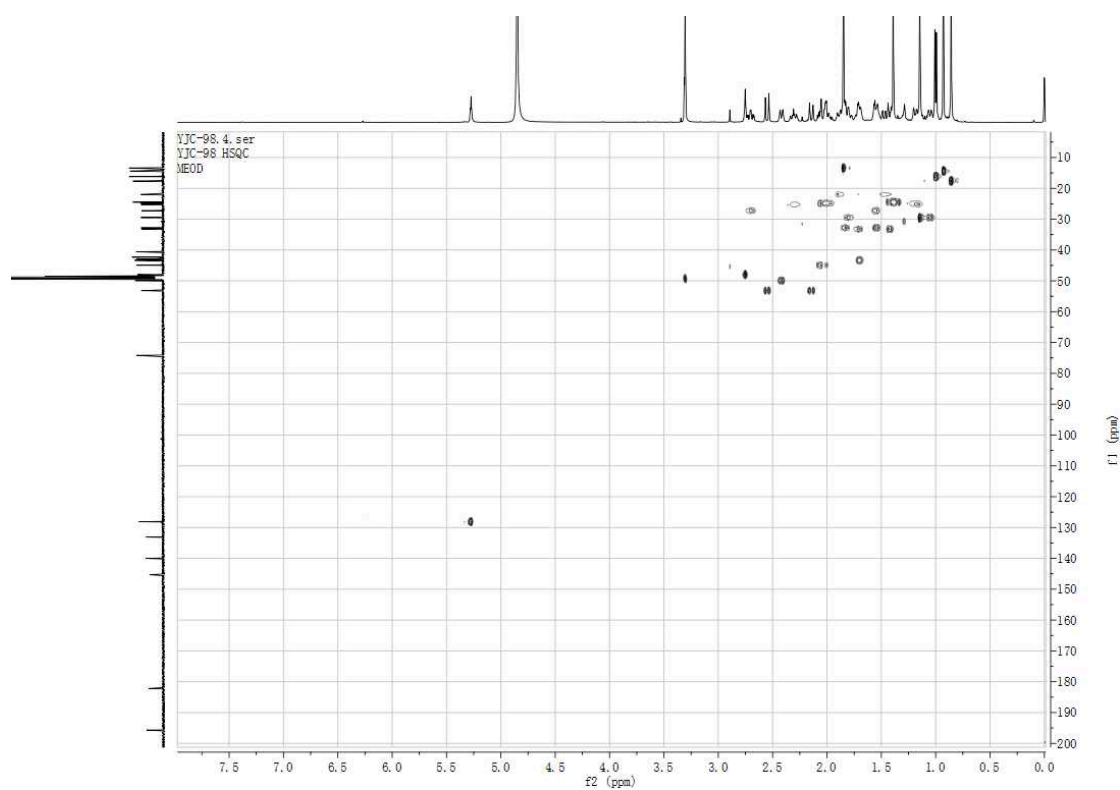

Figure S15. HSQC spectrum of **2**

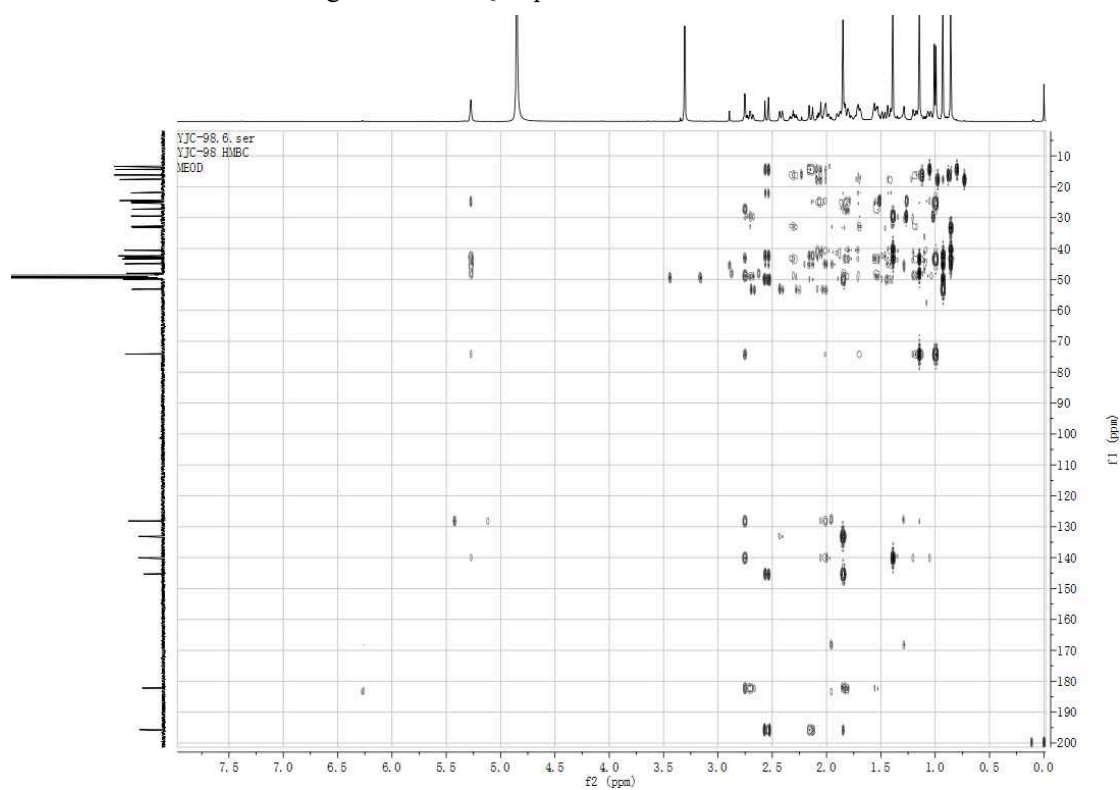

Figure S16. HMBC spectrum of **2**

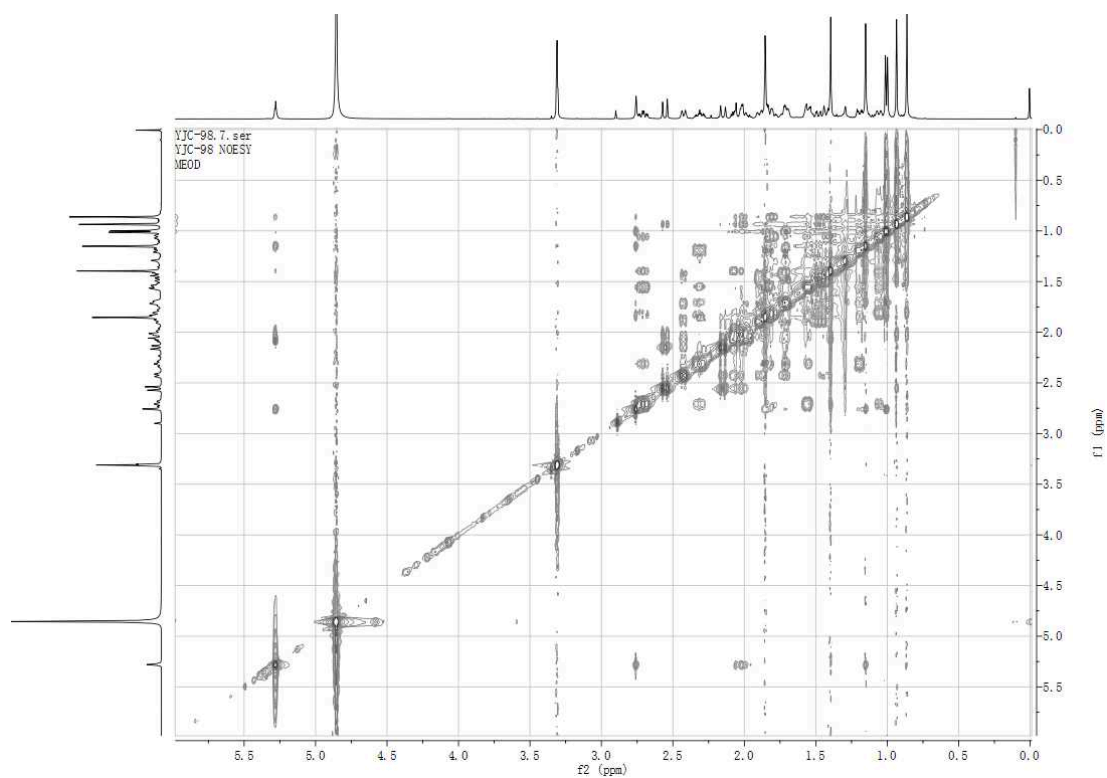

Figure S17. NOESY spectrum of **2**

## Display Report

### Analysis Info

Analysis Name \\ESI-PC\data-D\Data\GJH\20211017-POS\YJC-98.d  
Method tune\_pos\_standard\_20141031.m  
Sample Name YJC-98  
Comment

Acquisition Date 2021/10/17 10:15:50

Operator Demo User  
Instrument maXis HD 1820881.21303

### Acquisition Parameter

|             |          |                      |          |                  |             |
|-------------|----------|----------------------|----------|------------------|-------------|
| Source Type | ESI      | Ion Polarity         | Positive | Set Nebulizer    | 0.3 Bar     |
| Focus       | Active   | Set Capillary        | 3500 V   | Set Dry Heater   | 200 $\mu$ C |
| Scan Begin  | 50 m/z   | Set End Plate Offset | -500 V   | Set Dry Gas      | 4.0 l/min   |
| Scan End    | 3000 m/z | Set Charging Voltage | 2000 V   | Set Divert Valve | Waste       |
|             |          | Set Corona           | 0 nA     | Set APCI Heater  | 0 $\mu$ C   |

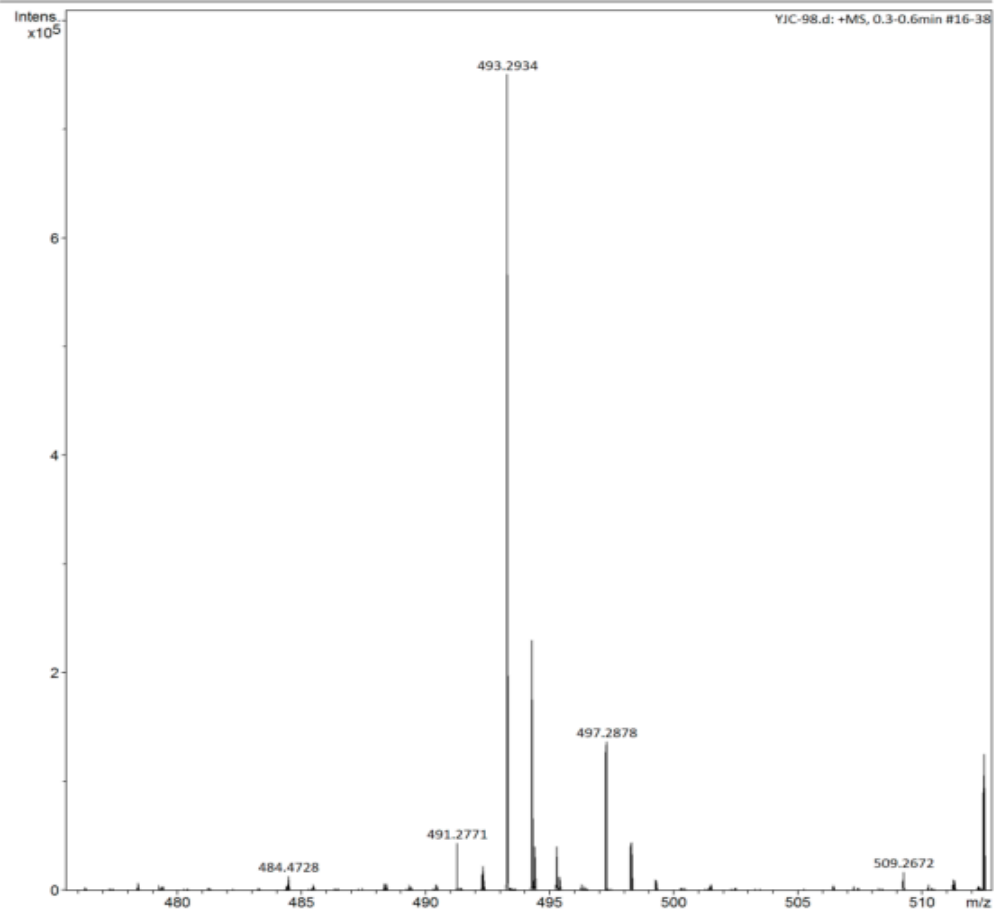

YJC-98.d

Bruker Compass DataAnalysis 4.2

printed: 2021/10/17 15:12:21

by: ZMH

Page 1 of 1

Figure S18. HR-ESI-MS Spectrum of **2**

# Thermo Scientific ~ VISIONpro SOFTWARE V4.41

Operator Name (None Entered)  
 Department (None Entered)  
 Organization (None Entered)  
 Information (None Entered)

Date of Report 2021/10/9  
 Time of Report 22:11:18下午

## Scan Graph

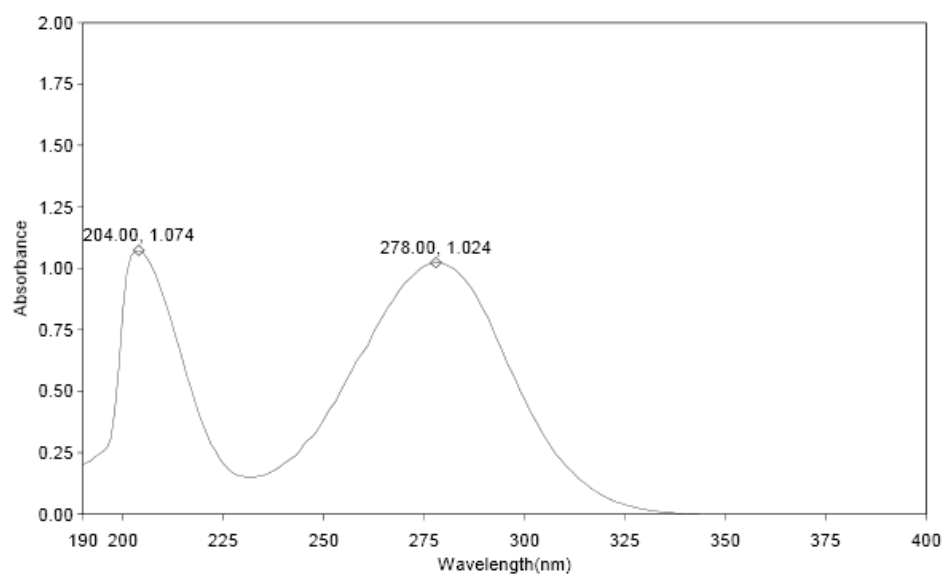

## Results Table - scan022,YJC-98,Cycle01

| nm     | A     | Peak Pick Method             |
|--------|-------|------------------------------|
| 204.00 | 1.074 | Find 8 Peaks Above -3.0000 A |
| 278.00 | 1.024 | Start Wavelength190.00 nm    |
|        |       | Stop Wavelength400.00 nm     |
|        |       | Sort By Wavelength           |

Sensitivity Auto

Figure S19. UV spectrum of **2**

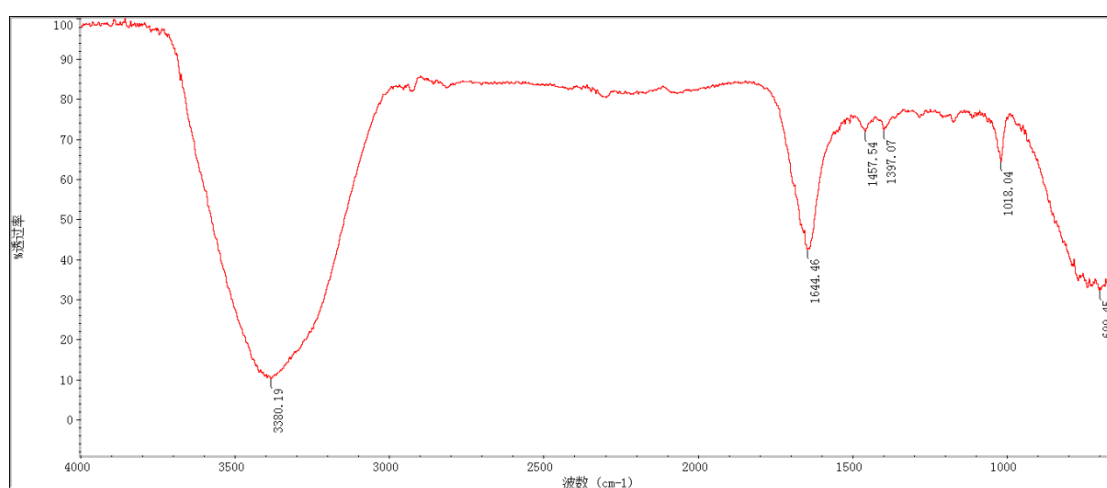

Figure S20. IR spectrum of **2**

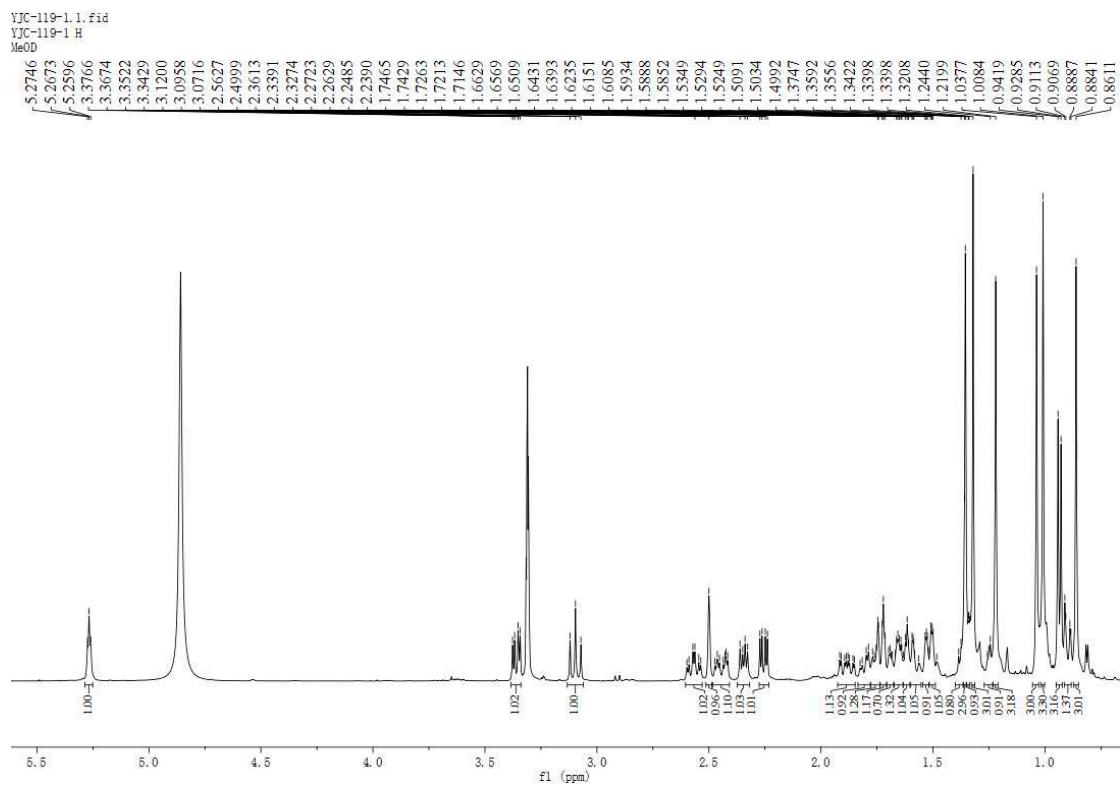

Figure S21.  $^1\text{H}$  NMR spectrum (500 MHz,  $\text{CD}_3\text{OD}$ ) of **3**

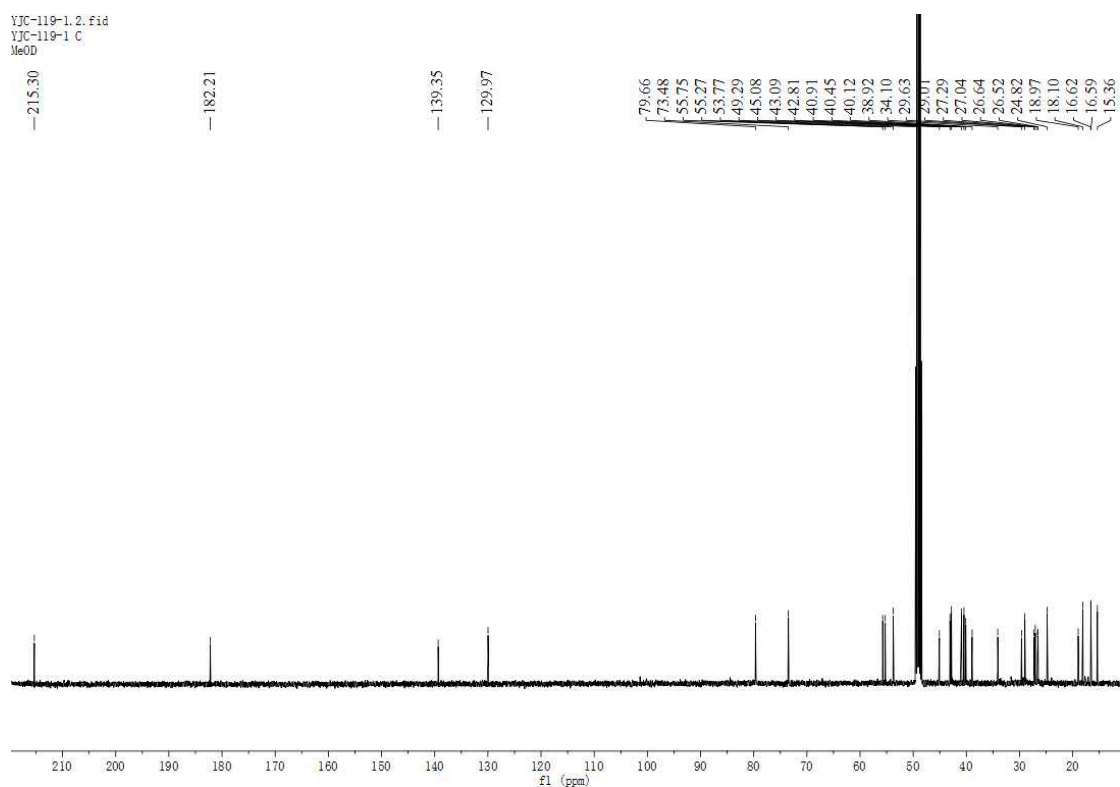

Figure S22.  $^{13}\text{C}$  NMR spectrum (125 MHz,  $\text{CD}_3\text{OD}$ ) of **3**

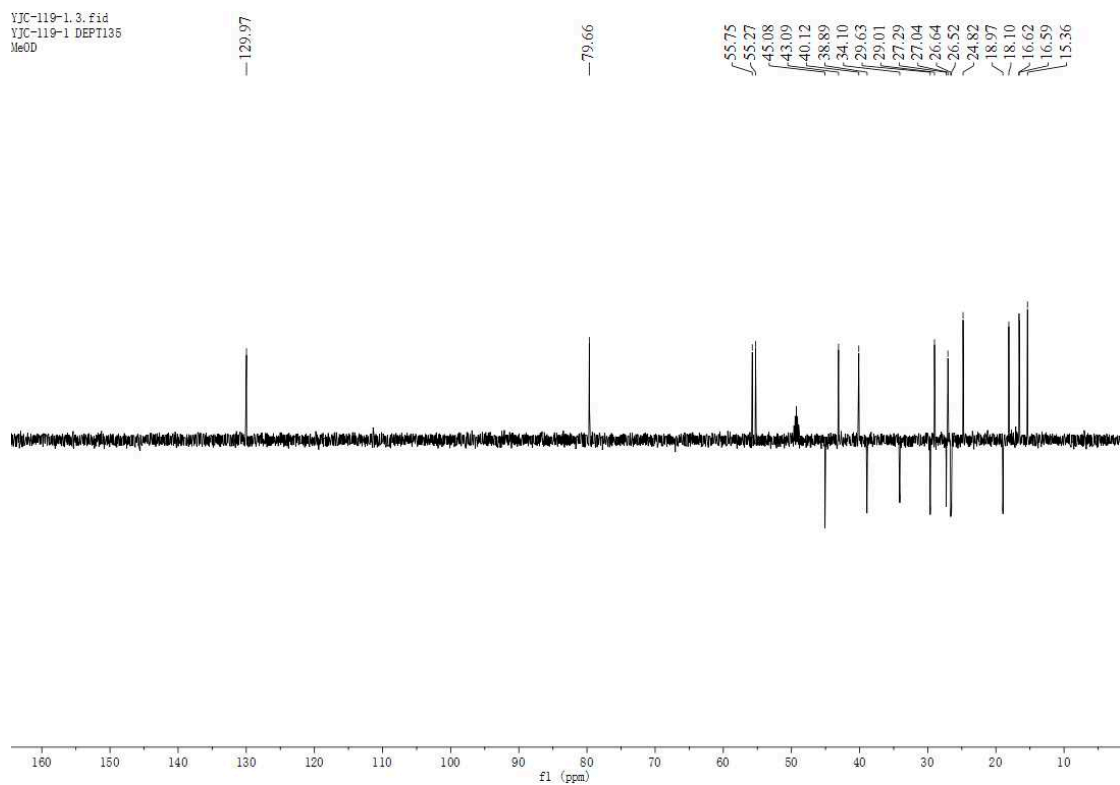

Figure S23. DEPT 135 spectrum (125 MHz, CD<sub>3</sub>OD) of **3**

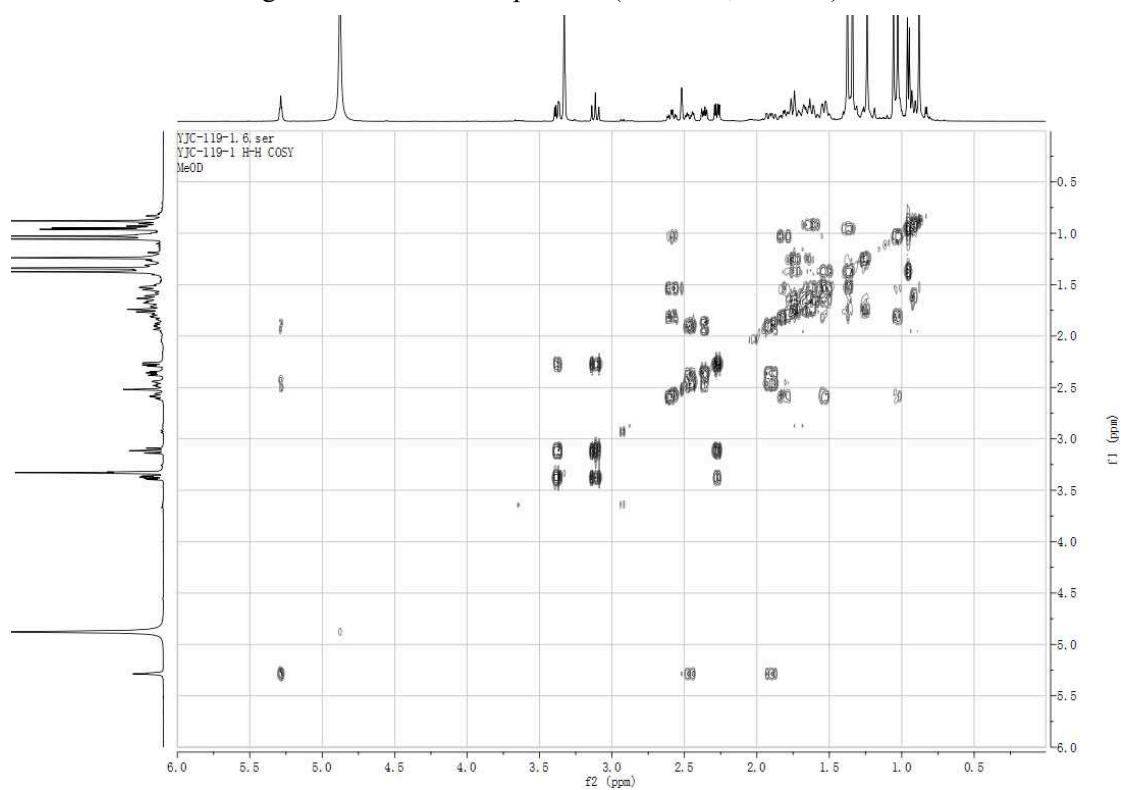

Figure S24. <sup>1</sup>H-<sup>1</sup>H COSY spectrum of **3**



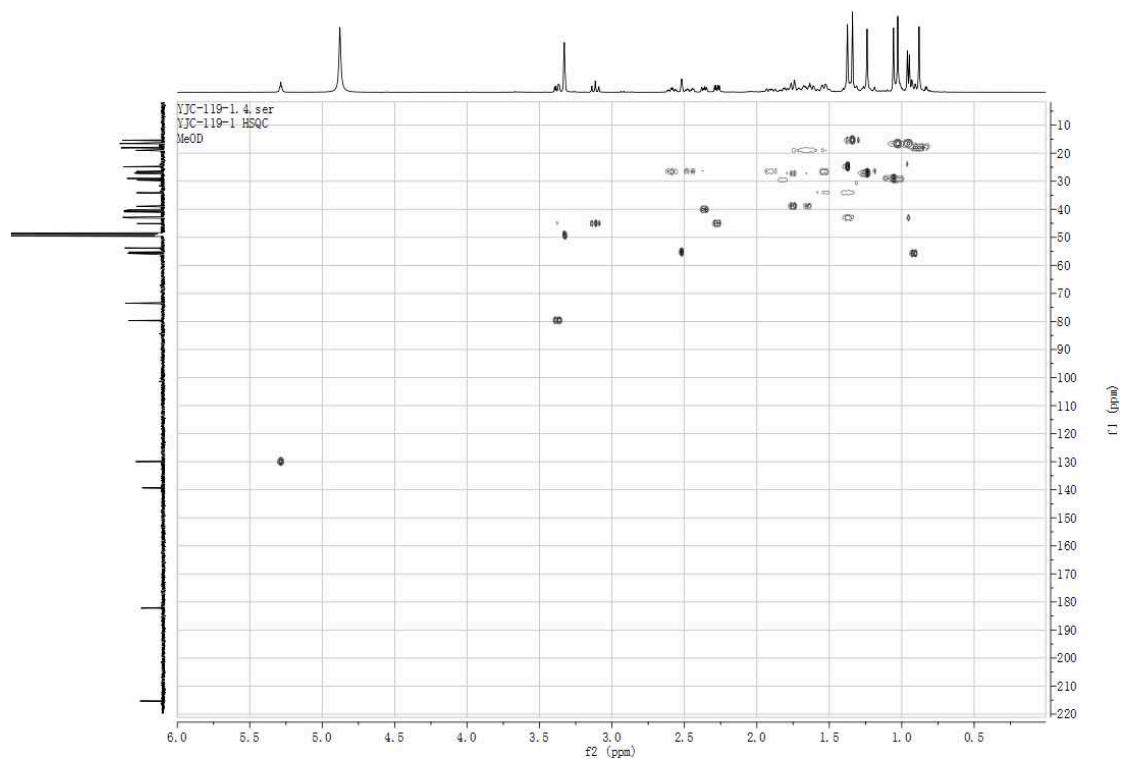

Figure S25. HSQC spectrum of **3**

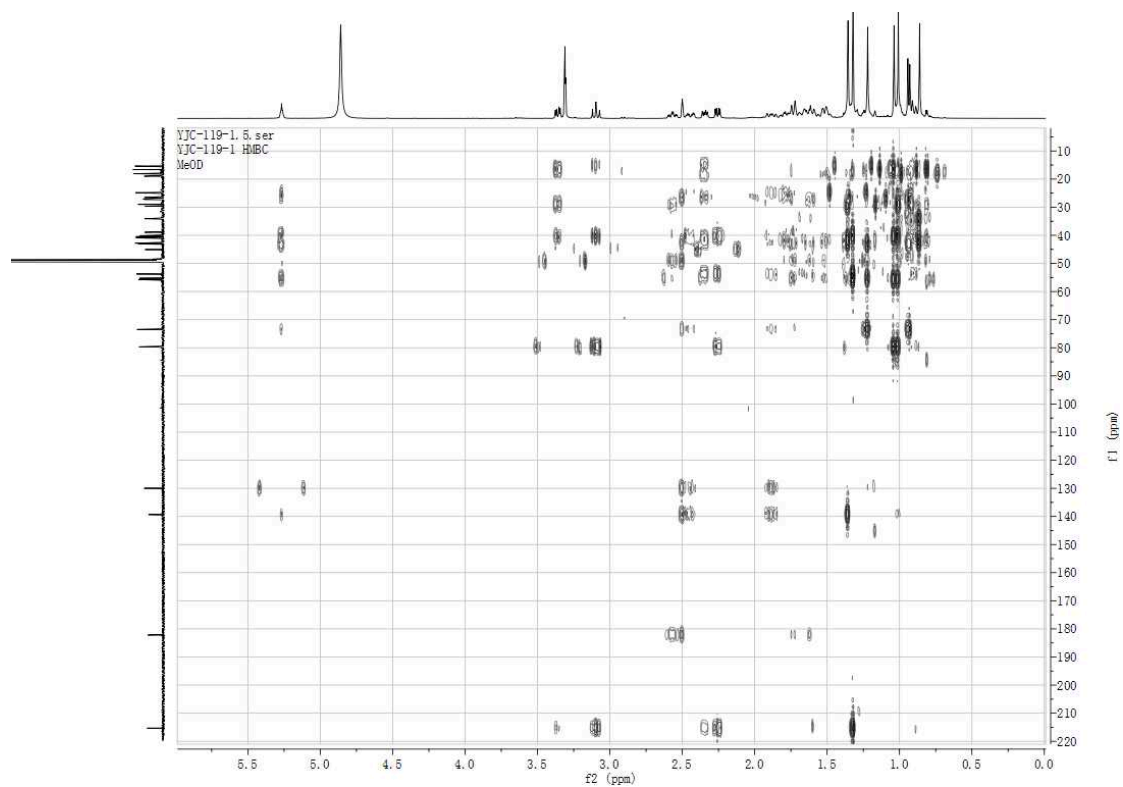

Figure S26. HMBC spectrum of **3**

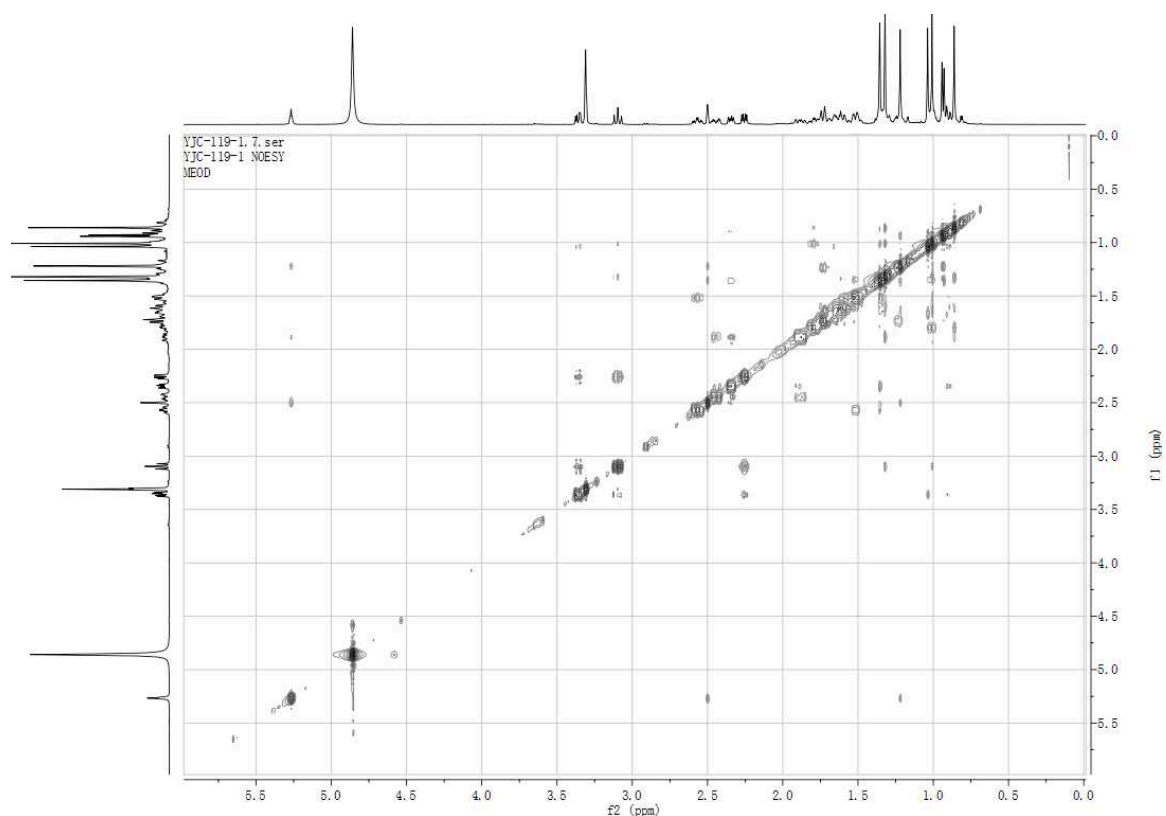

Figure S27. NOESY spectrum of **3**

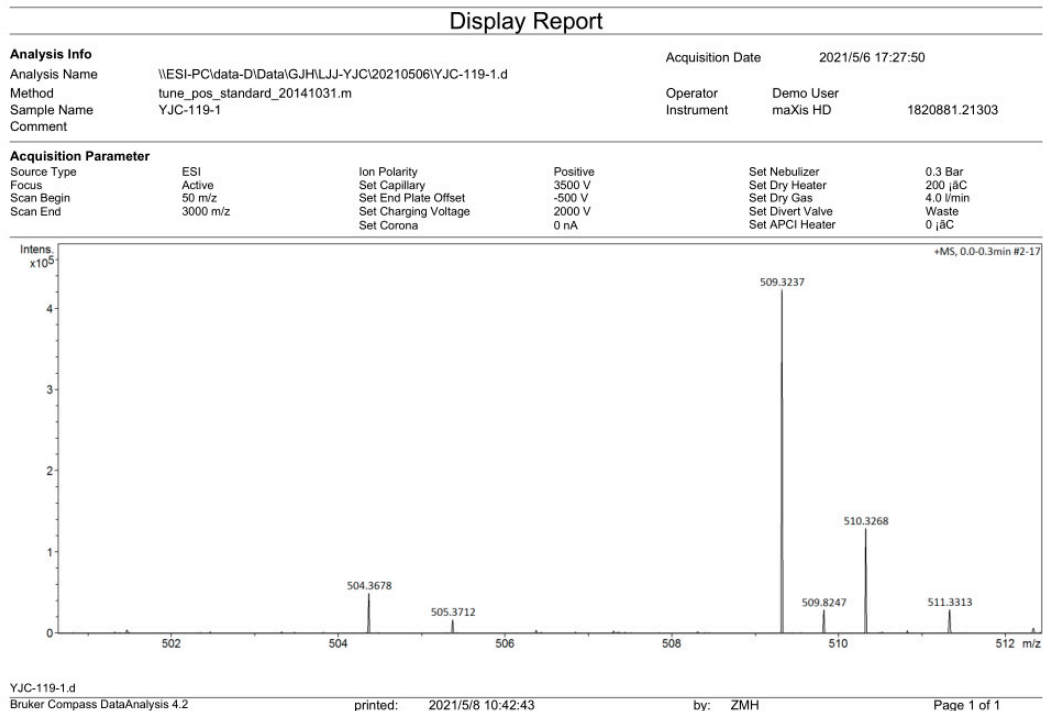

Figure S28. HR-ESI-MS Spectrum of **3**

Thermo Scientific ~ VISIONpro SOFTWARE V4.41

|               |                |                |            |
|---------------|----------------|----------------|------------|
| Operator Name | (None Entered) | Date of Report | 2021/10/9  |
| Department    | (None Entered) | Time of Report | 22:15:57下午 |
| Organization  | (None Entered) |                |            |
| Information   | (None Entered) |                |            |

Scan Graph

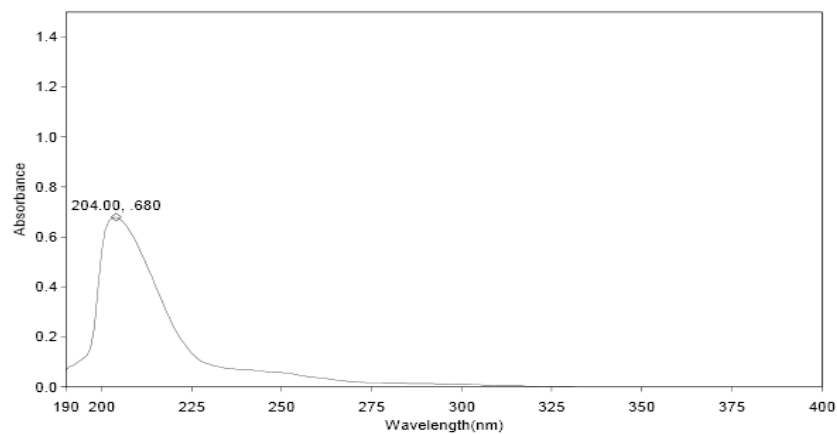

Results Table - scan023,YJC-119-1,Cycle01

|        |      |                              |
|--------|------|------------------------------|
| nm     | A    | Peak Pick Method             |
| 204.00 | .680 | Find 8 Peaks Above -3.0000 A |
|        |      | Start Wavelength 190.00 nm   |
|        |      | Stop Wavelength 400.00 nm    |
|        |      | Sort By Wavelength           |

Sensitivity Auto

Figure S29. UV spectrum of **3**

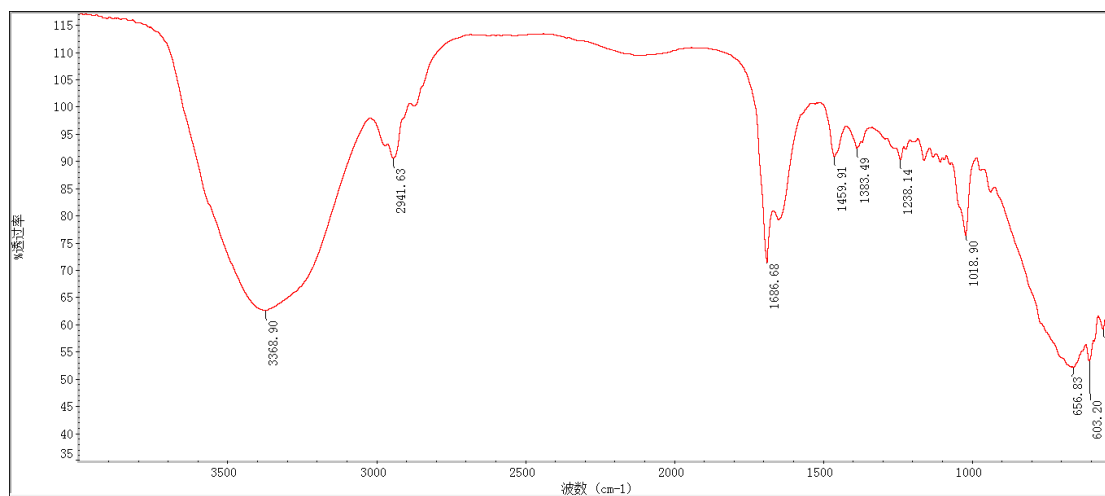

Figure S30. IR spectrum of **3**

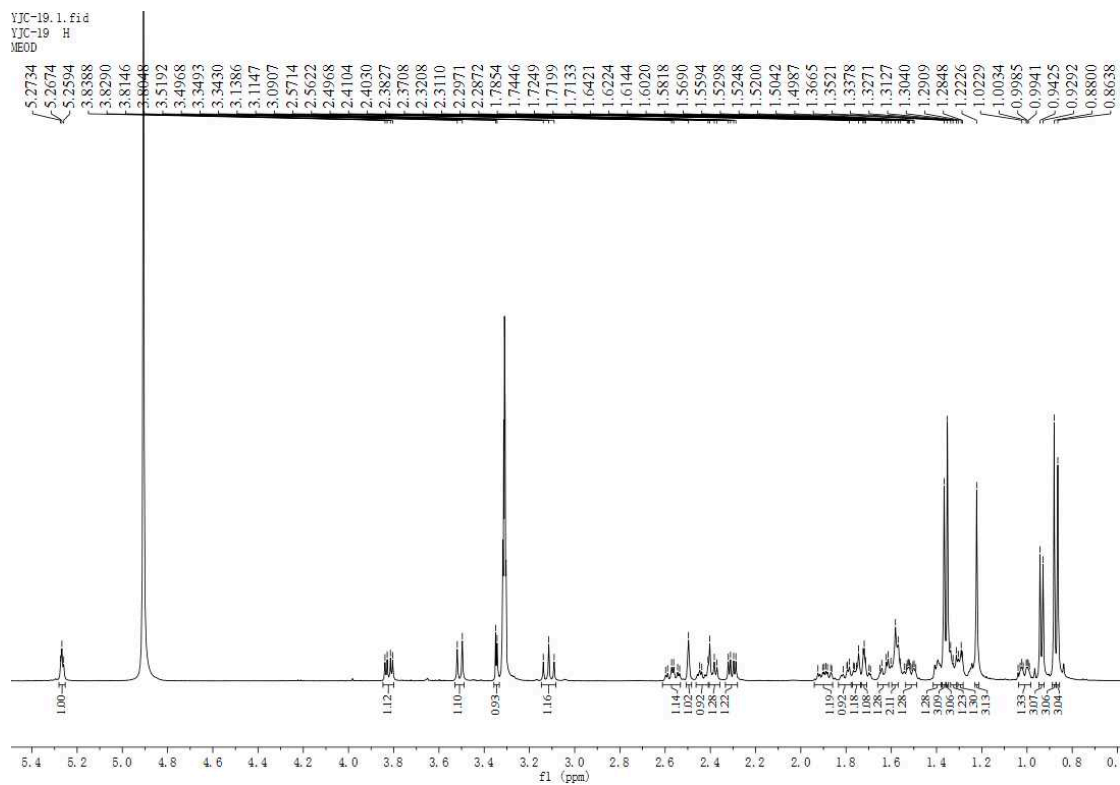

Figure S31.  $^1\text{H}$  NMR spectrum (500 MHz,  $\text{CD}_3\text{OD}$ ) of **4**

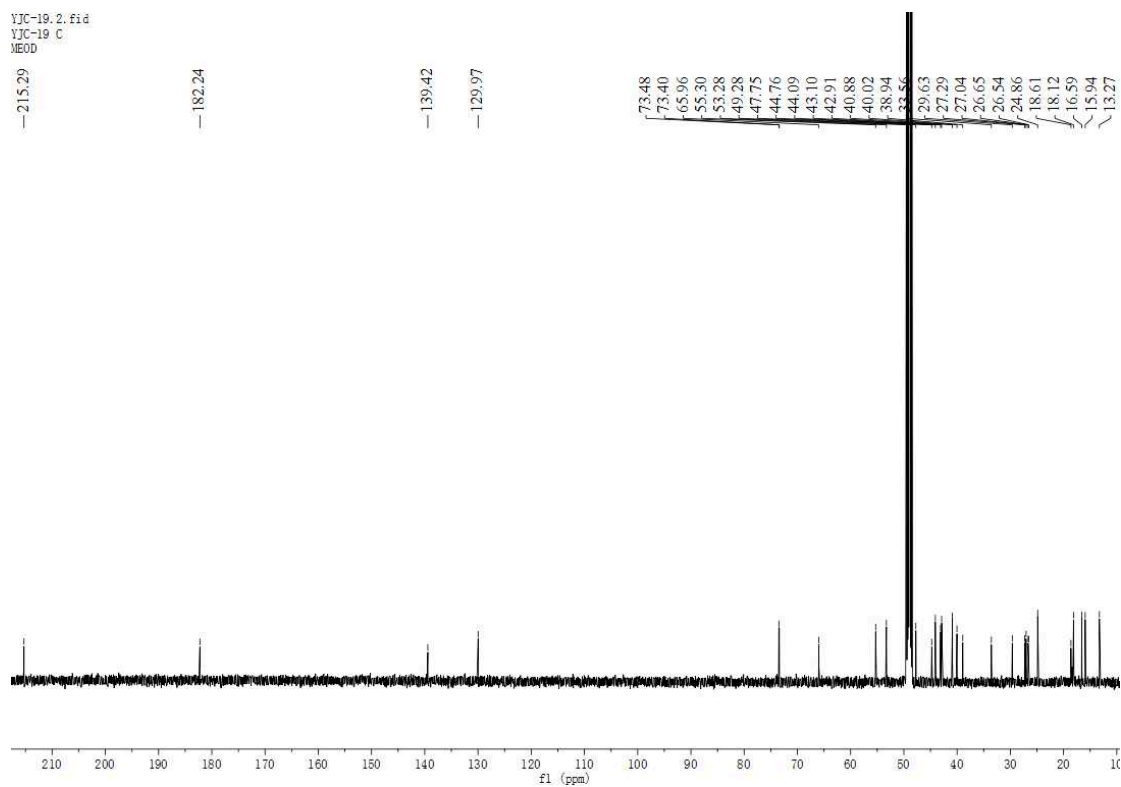

Figure S32.  $^{13}\text{C}$  NMR spectrum (125 MHz,  $\text{CD}_3\text{OD}$ ) of **4**

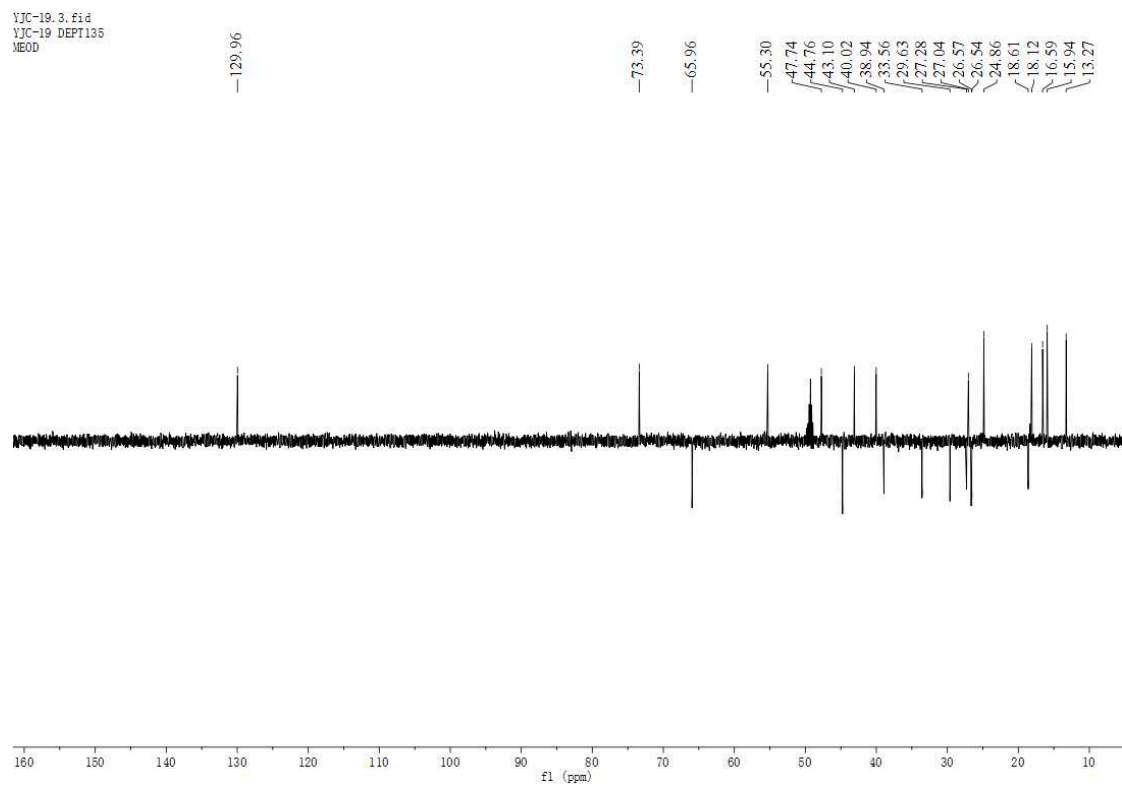

Figure S33. DEPT 135 spectrum (125 MHz, CD<sub>3</sub>OD) of **4**

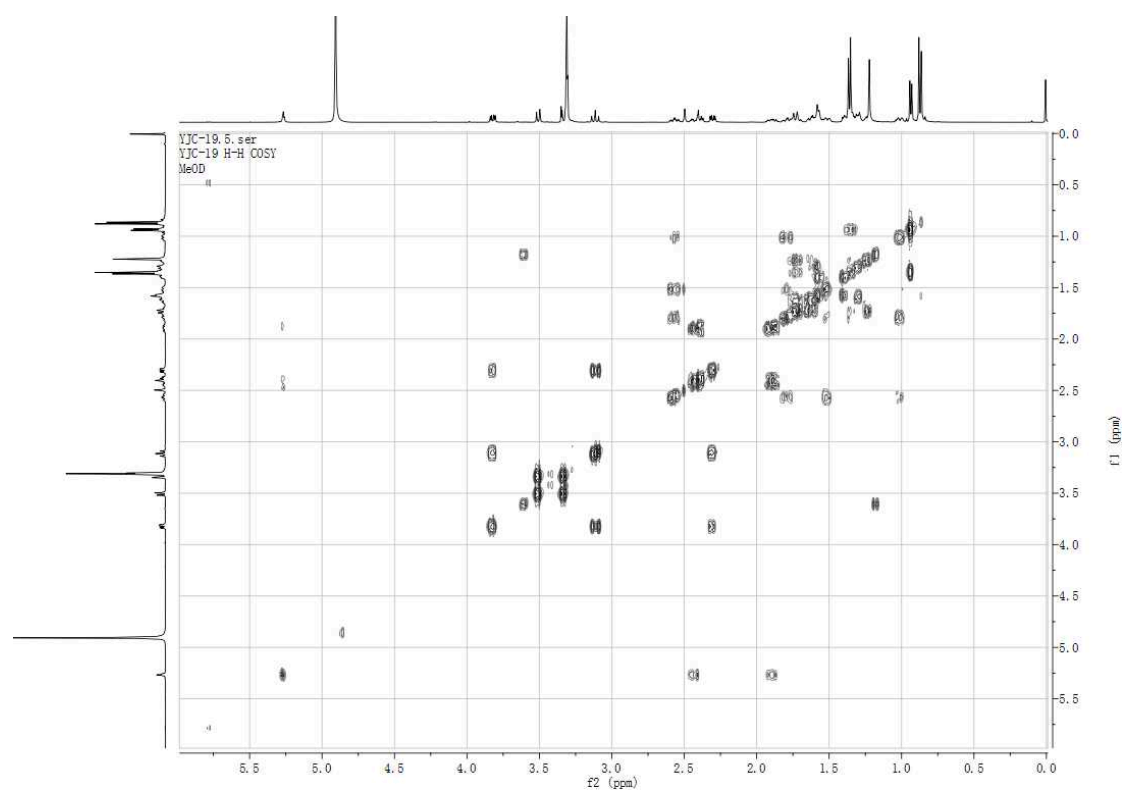

Figure S34. <sup>1</sup>H-<sup>1</sup>H COSY spectrum of **4**

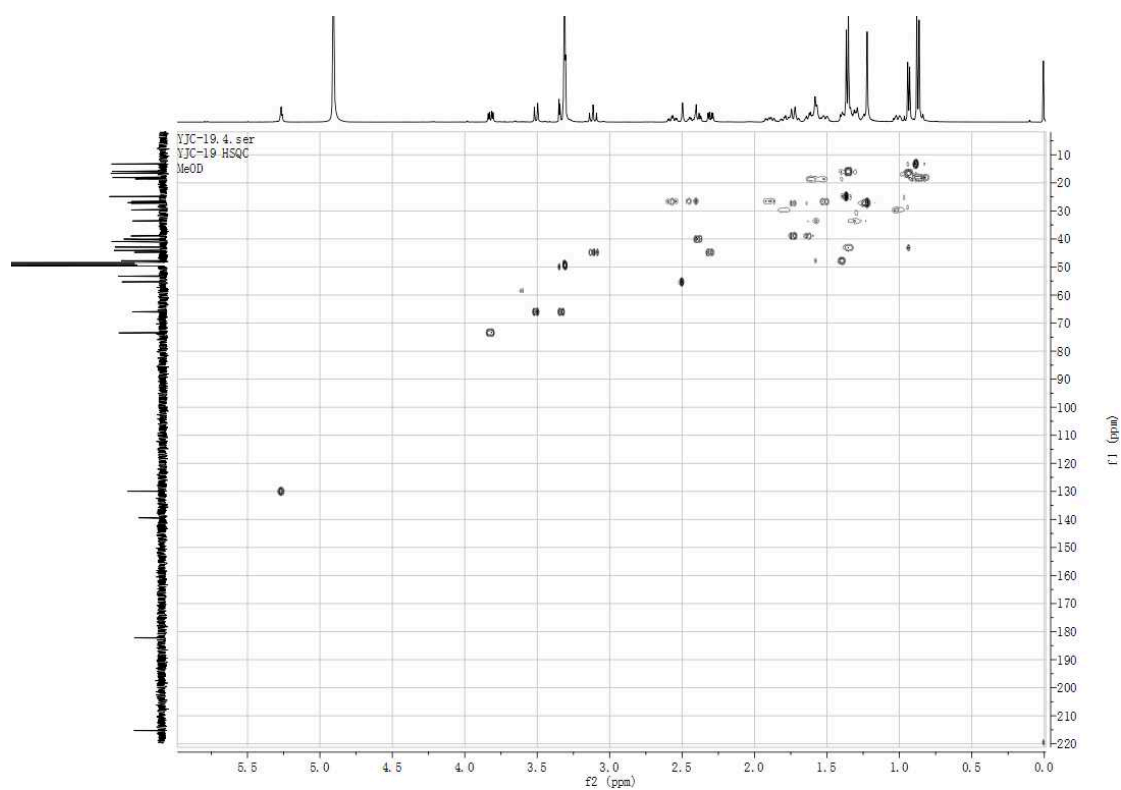

Figure S35. HSQC spectrum of **4**

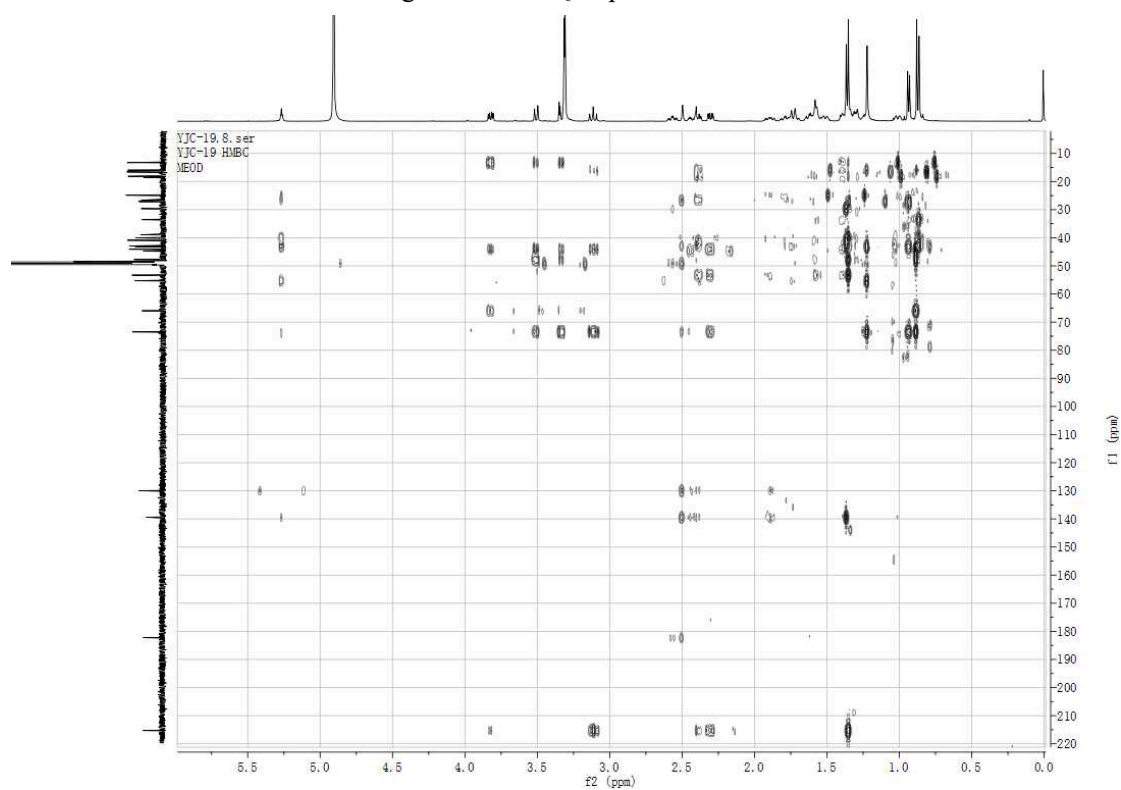

Figure S36. HMBC spectrum of **4**

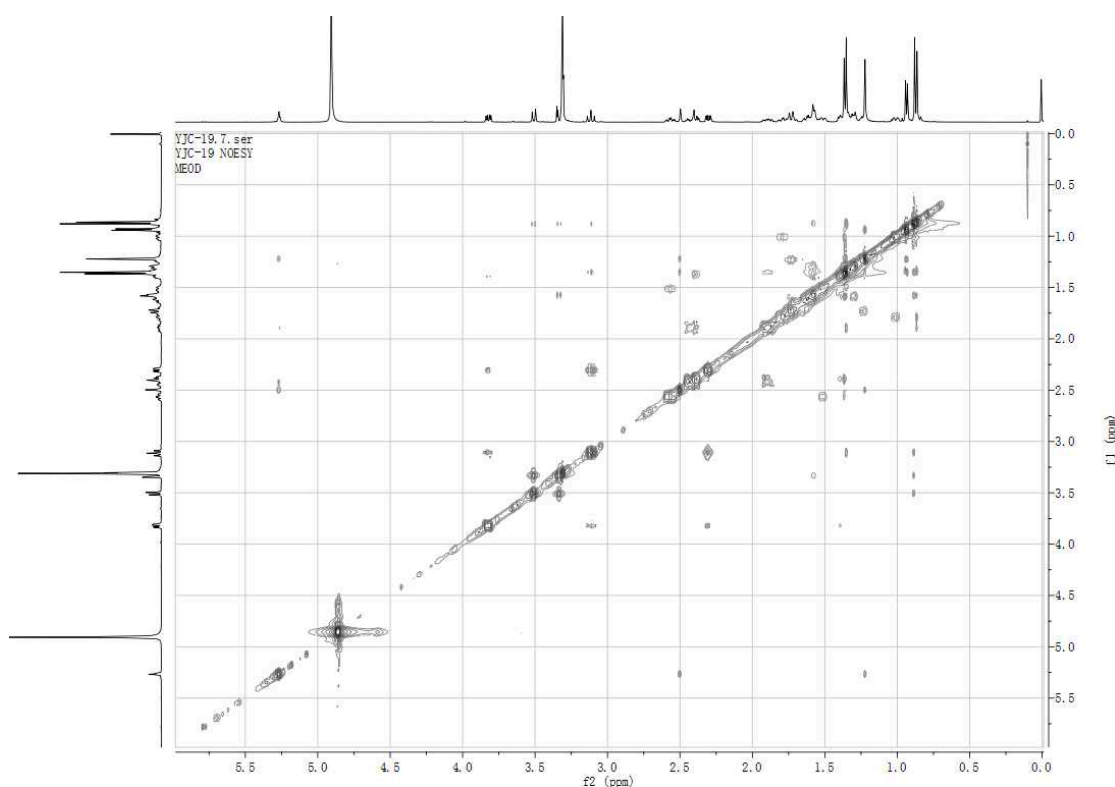

Figure S37. NOESY spectrum of **4**

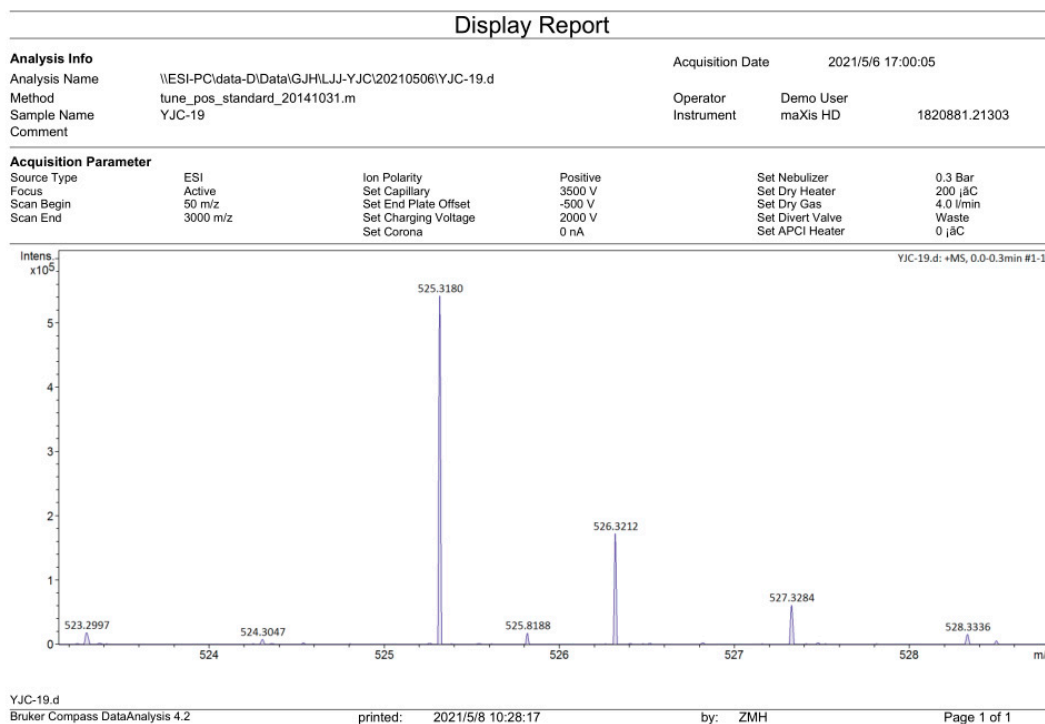

Figure S38. HR-ESI-MS Spectrum of **4**

Thermo Scientific ~ VISIONpro SOFTWARE V4.41

Operator Name (None Entered)  
Department (None Entered)  
Organization (None Entered)  
Information (None Entered)

Date of Report 2021/10/9  
Time of Report 22:01:46下午

Scan Graph

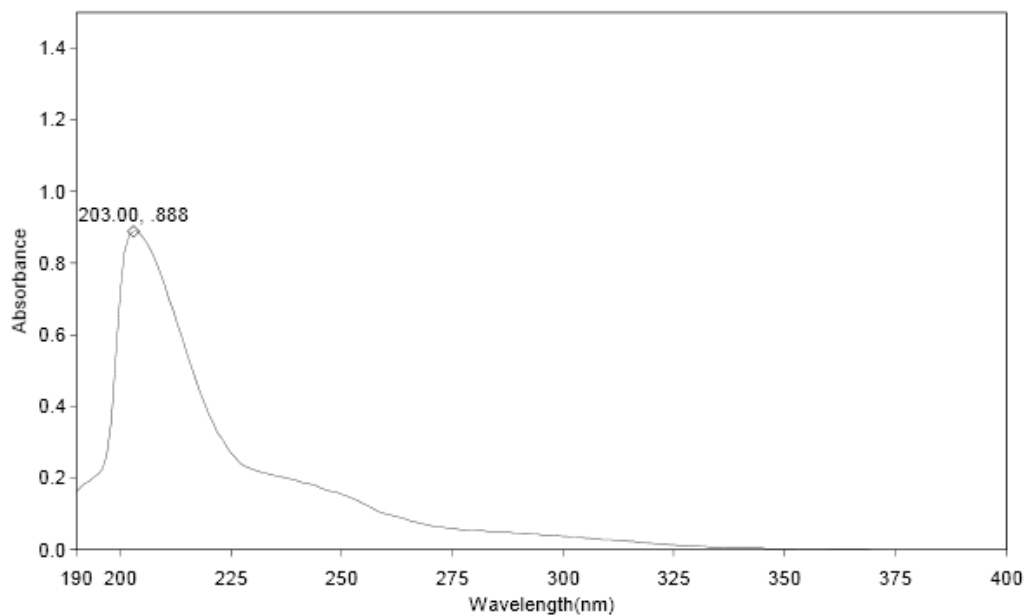

Results Table - scan020,YJC-19,Cycle01

| nm                        | A    | Peak Pick Method             |
|---------------------------|------|------------------------------|
| 203.00                    | .888 | Find 8 Peaks Above -3.0000 A |
| Start Wavelength190.00 nm |      |                              |
| Stop Wavelength400.00 nm  |      |                              |
| Sort By Wavelength        |      |                              |

Sensitivity Auto

Figure S39. UV spectrum of 4

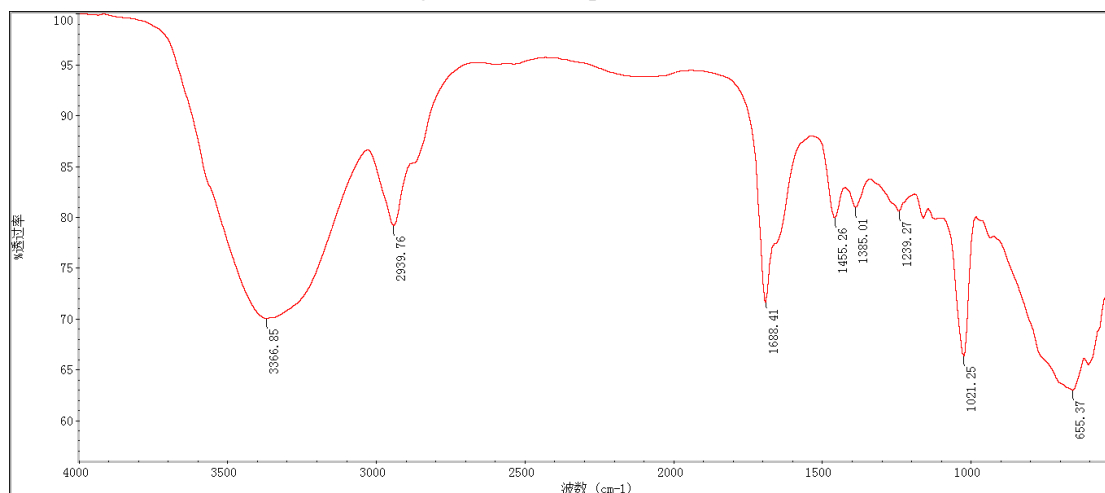

Figure S40. IR spectrum of 4



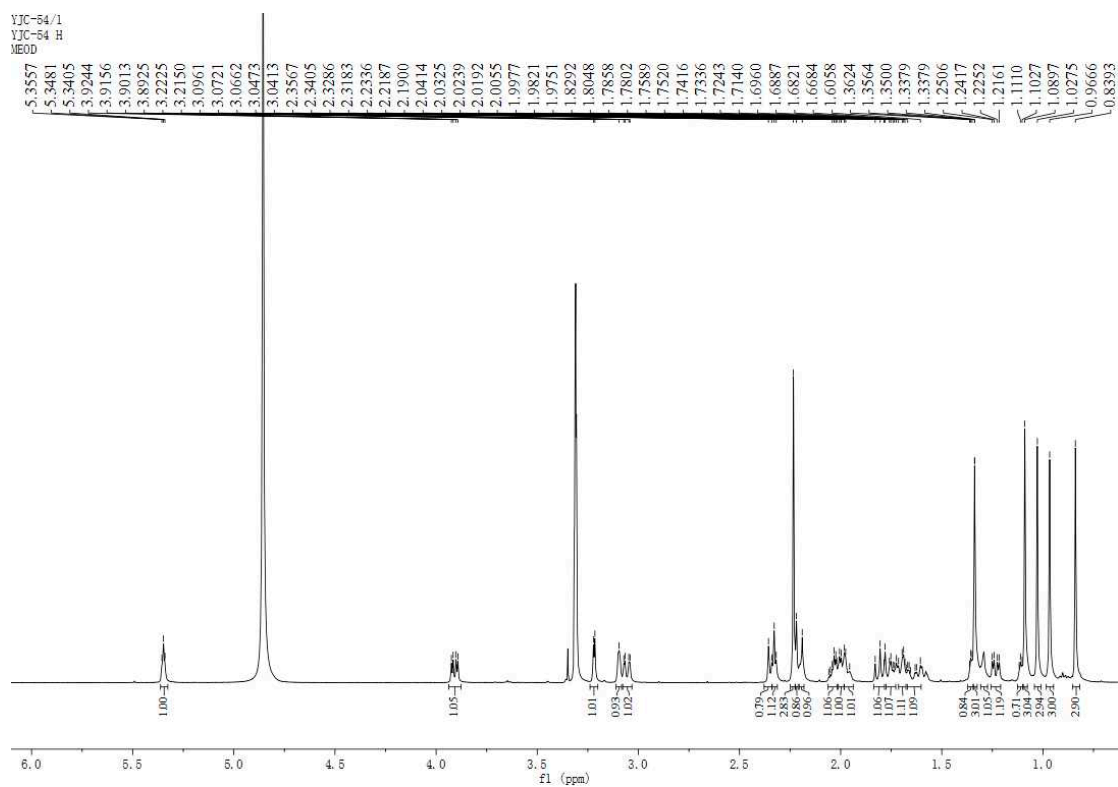

Figure S41.  $^1\text{H}$  NMR spectrum (500 MHz,  $\text{CD}_3\text{OD}$ ) of **5**

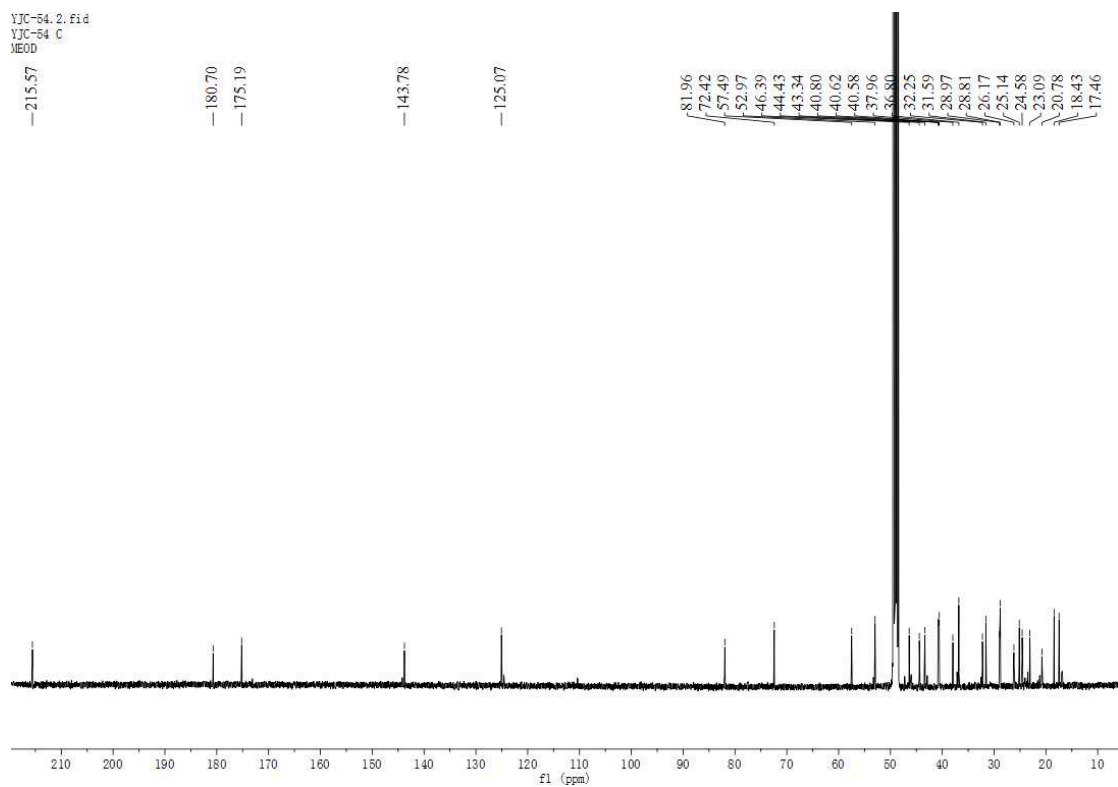

Figure S42.  $^{13}\text{C}$  NMR spectrum (125 MHz,  $\text{CD}_3\text{OD}$ ) of **5**

YJC-54.3.fid  
YJC-59 DEPT135  
MEOD

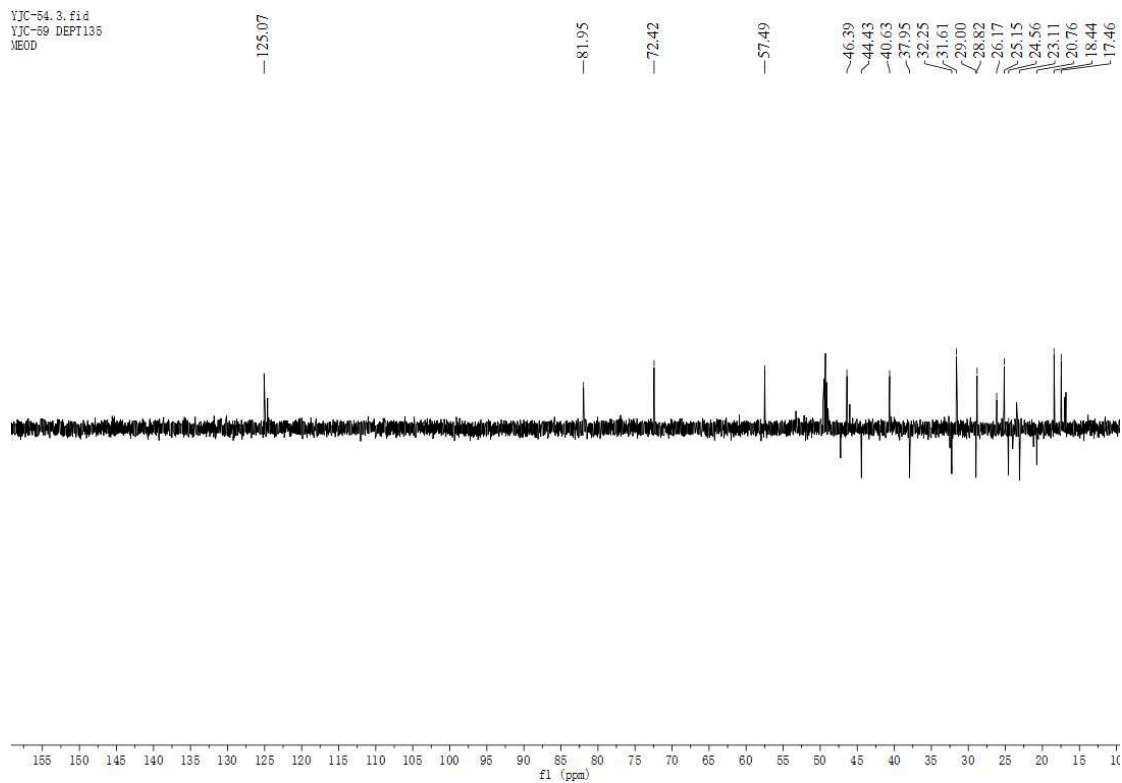

Figure S43. DEPT 135 spectrum (125 MHz, CD<sub>3</sub>OD) of **5**

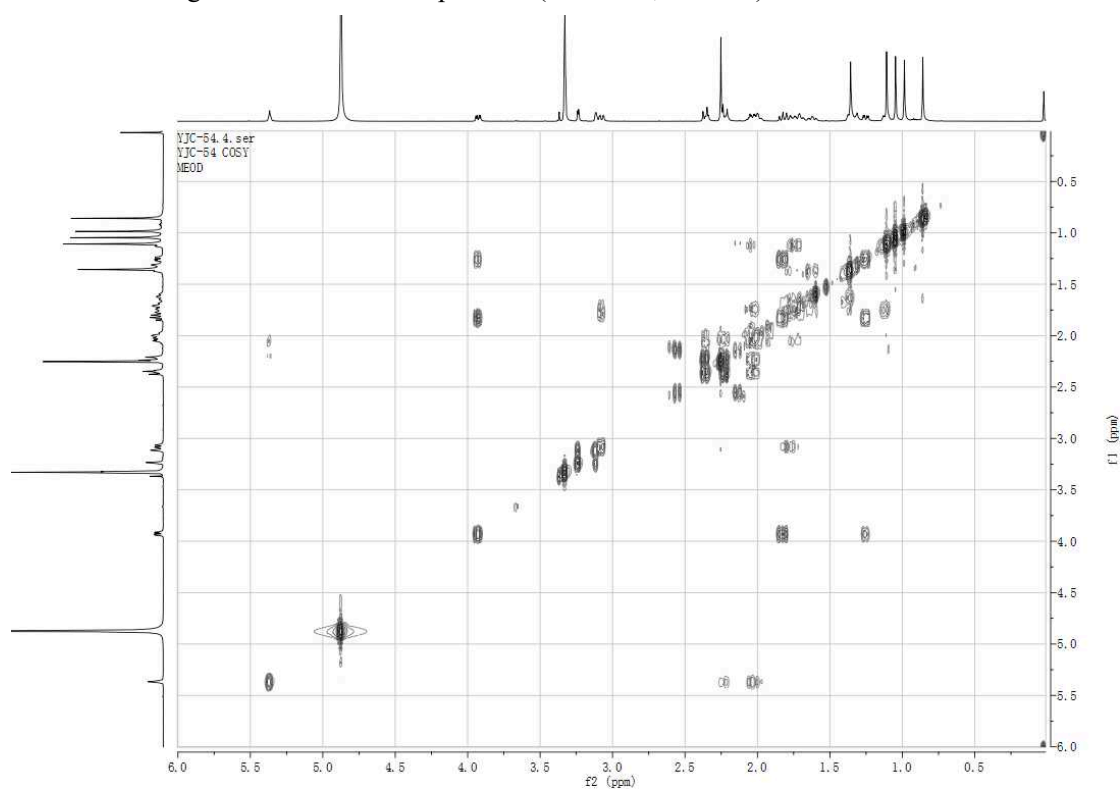

Figure S44. <sup>1</sup>H-<sup>1</sup>H COSY spectrum of **5**

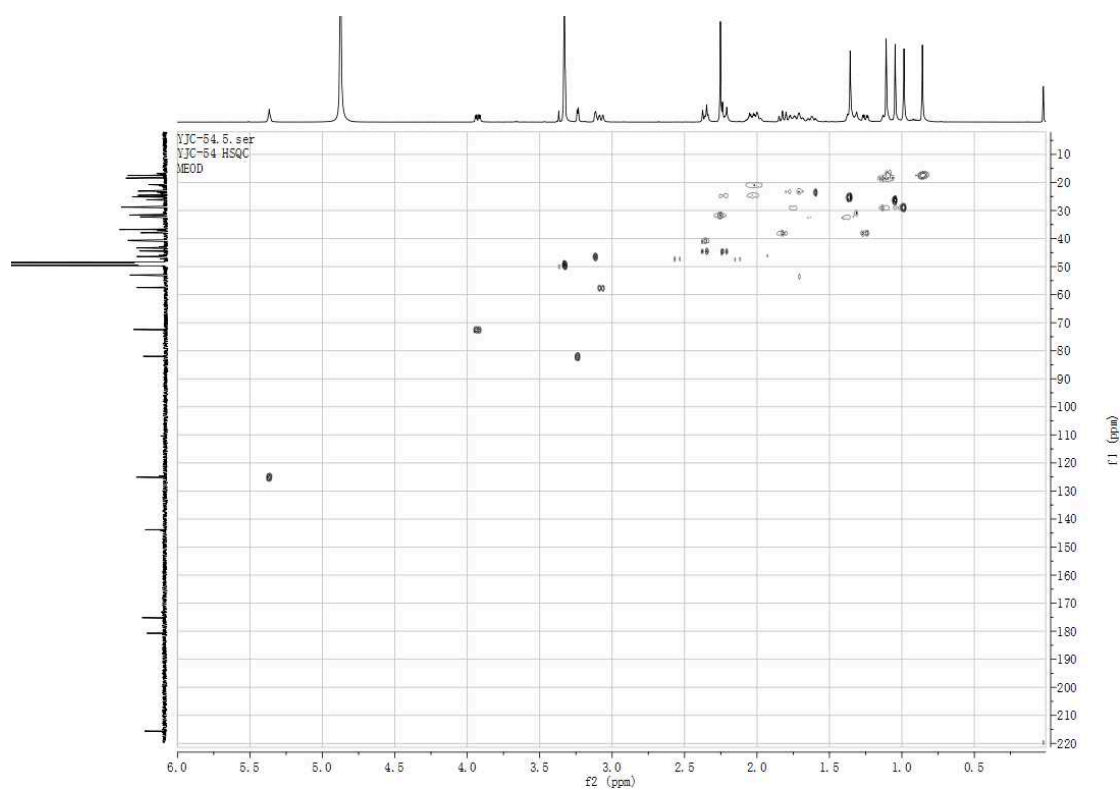

Figure S45. HSQC spectrum of **5**

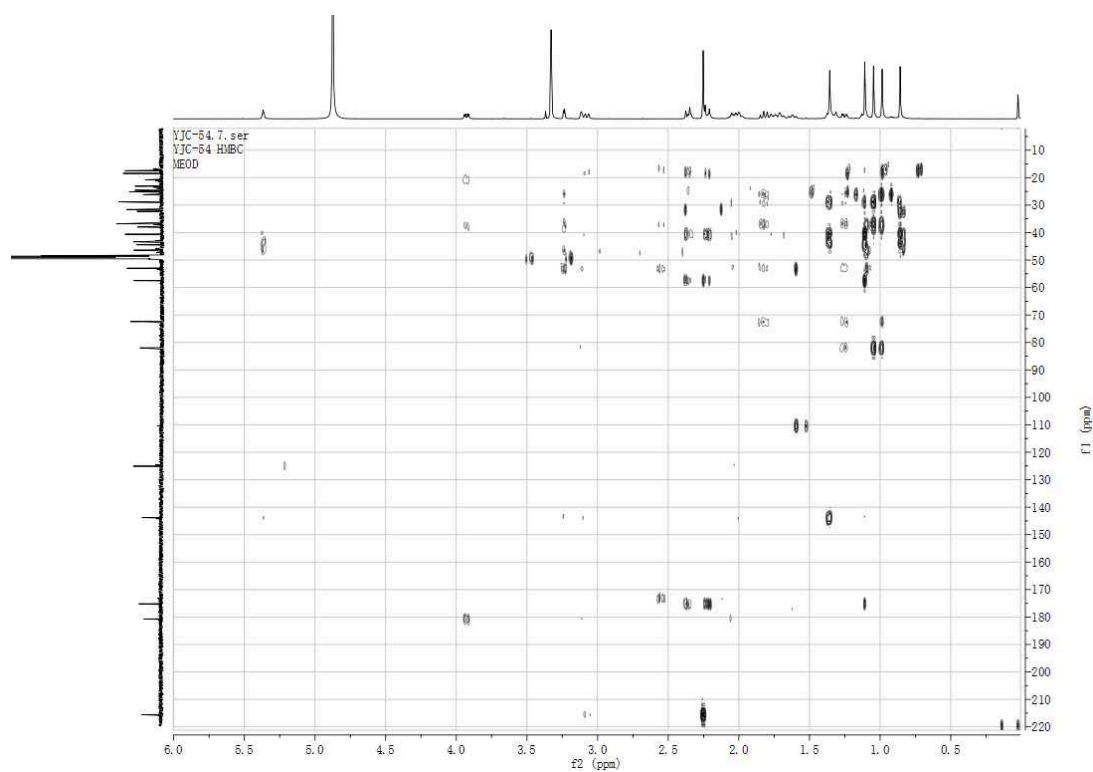

Figure S46. HMBC spectrum of **5**

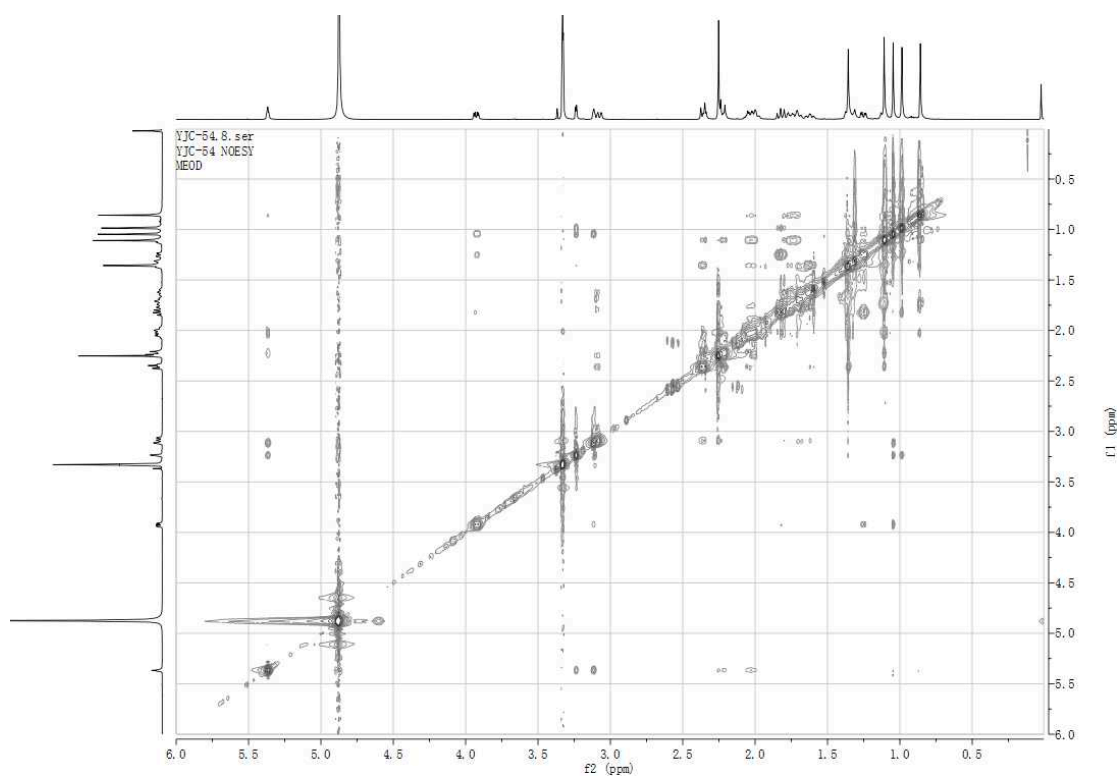

Figure S47. NOESY spectrum of **5**

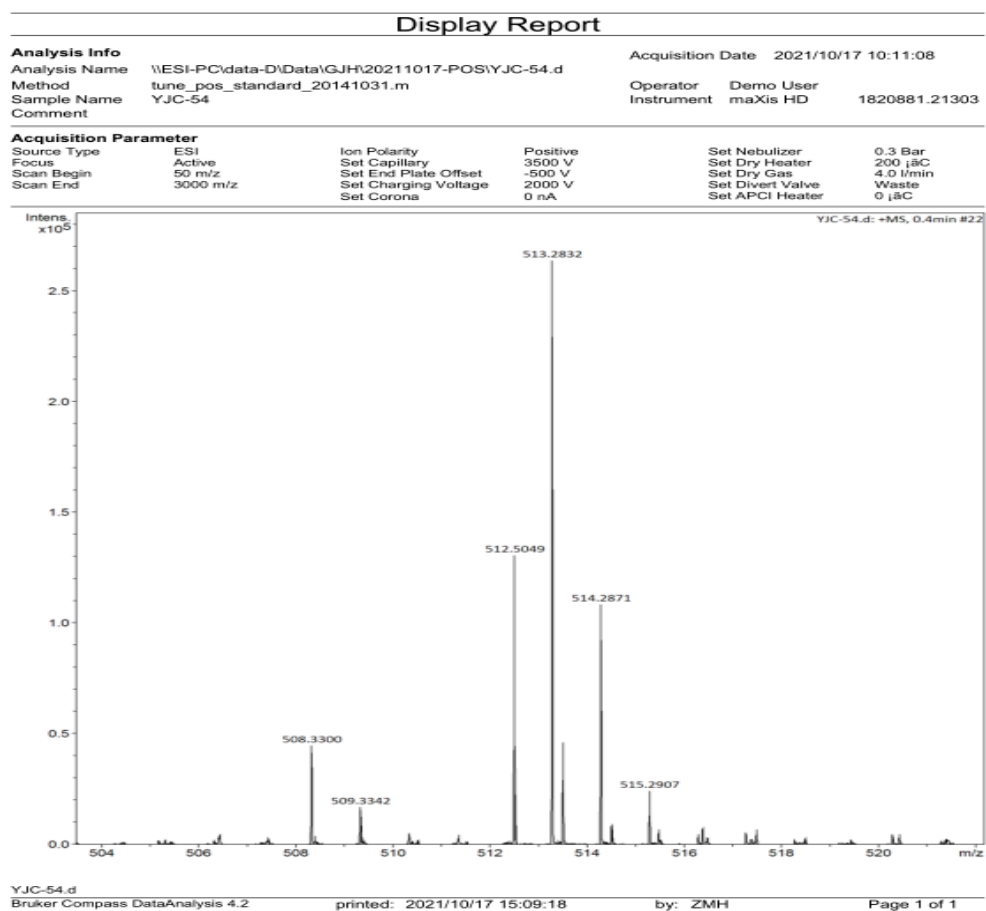

Figure S48. HR-ESI-MS Spectrum of **5**

Thermo Scientific ~ VISIONpro SOFTWARE V4.41

Operator Name (None Entered)  
 Department (None Entered)  
 Organization (None Entered)  
 Information (None Entered)

Date of Report 2021/10/9  
 Time of Report 22:45:59下午

Scan Graph

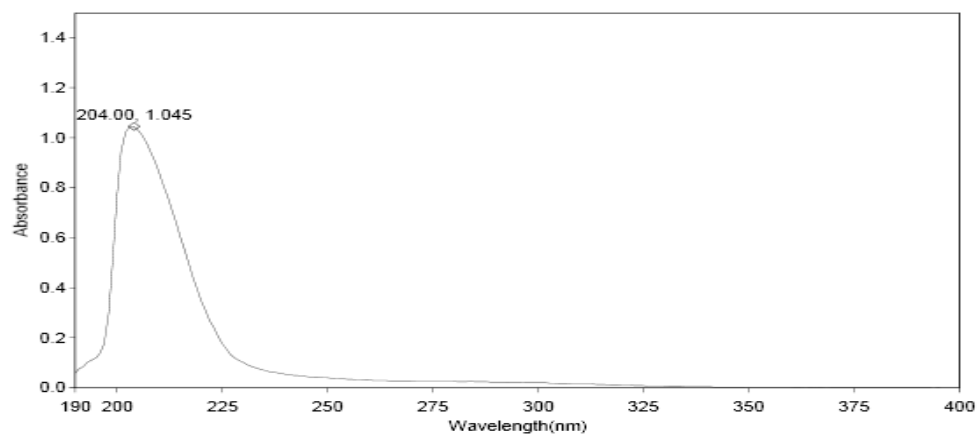

Results Table - scan030,YJC-54,Cycle01

| nm                         | A     | Peak Pick Method             |
|----------------------------|-------|------------------------------|
| 204.00                     | 1.045 | Find 8 Peaks Above -3.0000 A |
| Start Wavelength 190.00 nm |       |                              |
| Stop Wavelength 400.00 nm  |       |                              |
| Sort By Wavelength         |       |                              |

Sensitivity Auto

Figure S49. UV spectrum of **5**

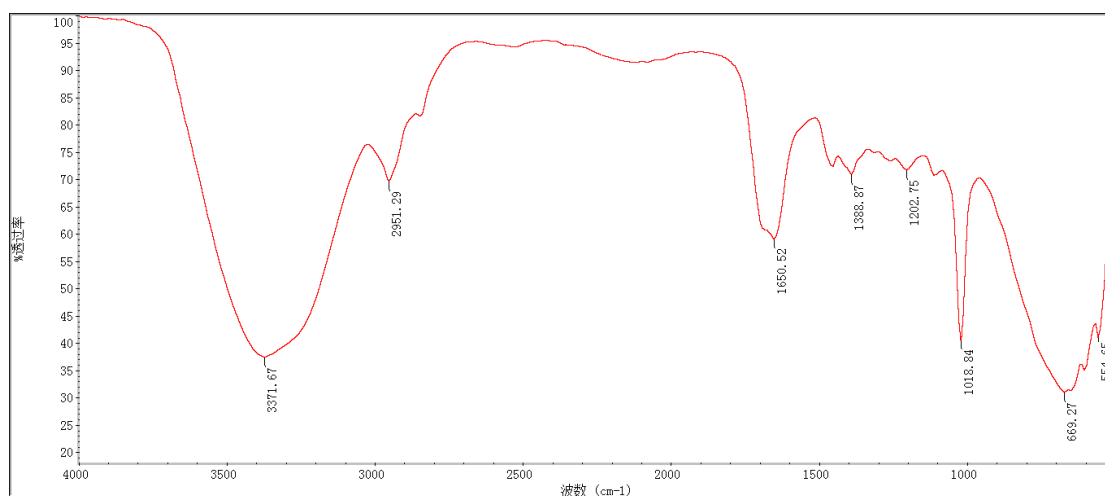

Figure S50. IR spectrum of **5**

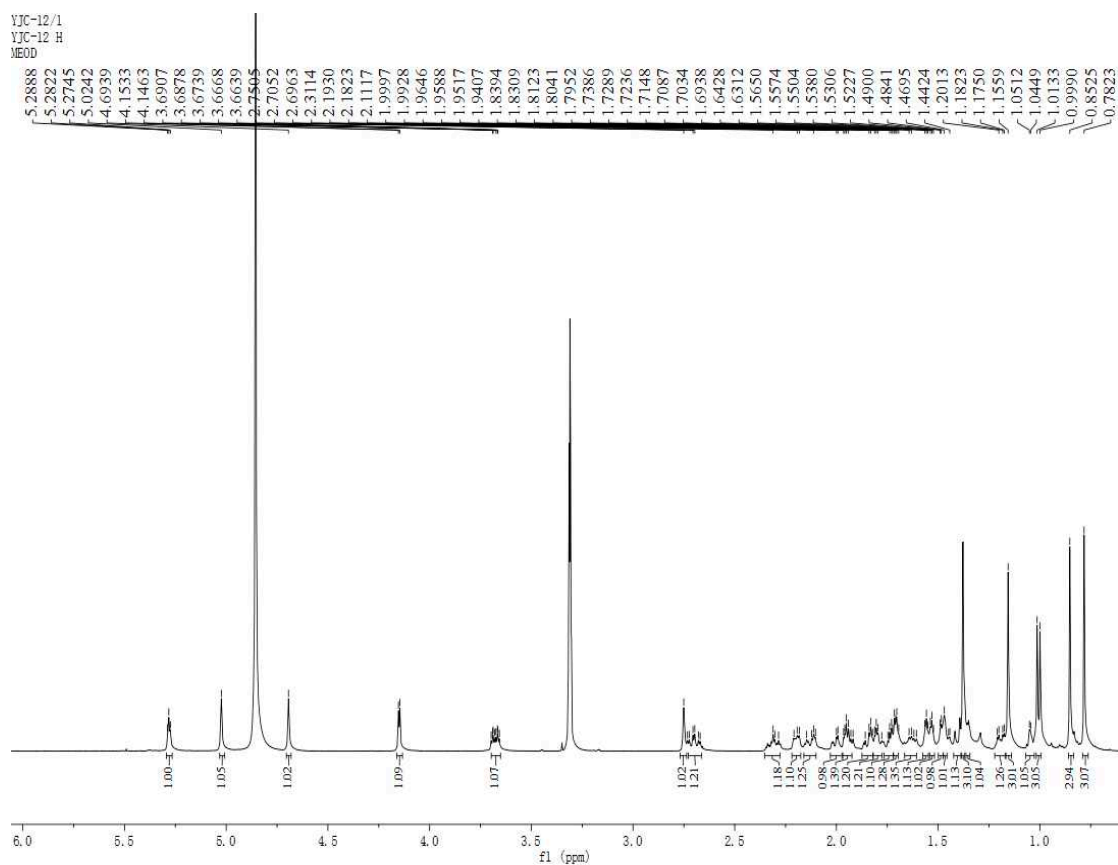

Figure S51.  $^1\text{H}$  NMR spectrum (500 MHz,  $\text{CD}_3\text{OD}$ ) of **6**

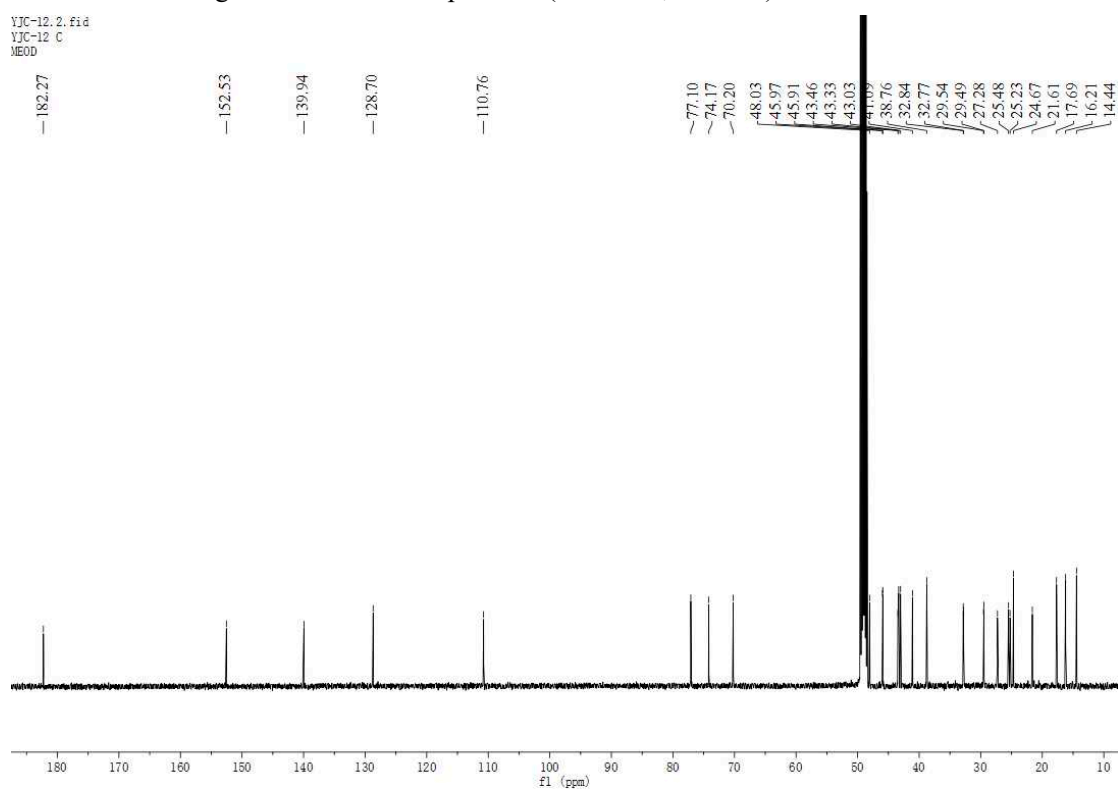

Figure S52.  $^{13}\text{C}$  NMR spectrum (125 MHz,  $\text{CD}_3\text{OD}$ ) of **6**

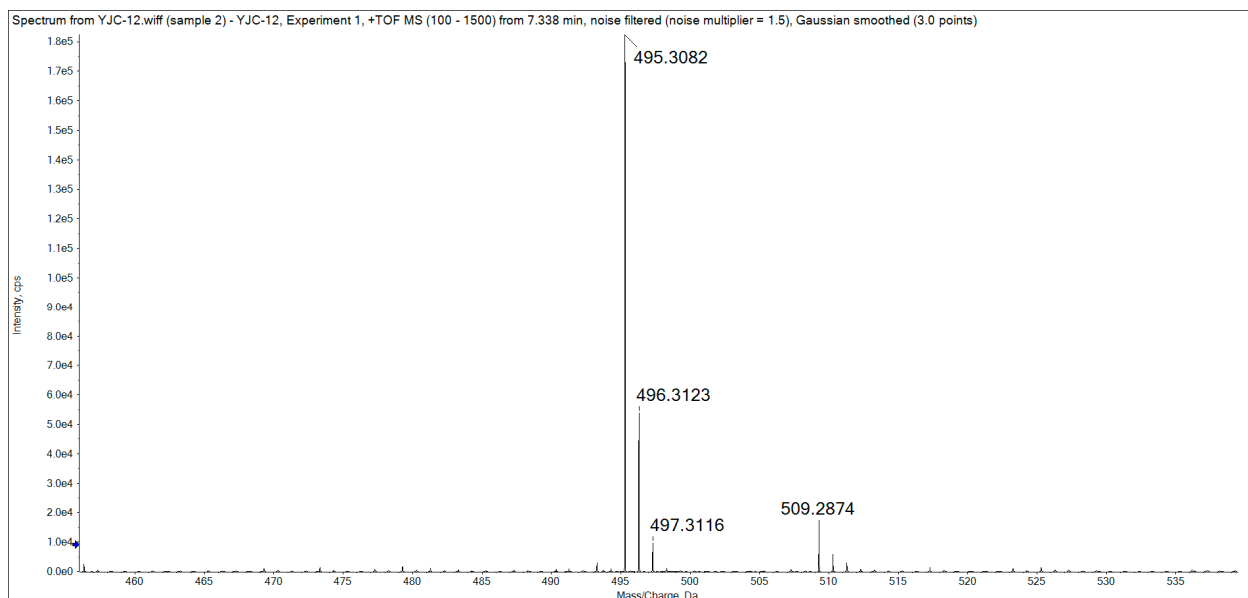

Figure S53. HR-ESI-MS Spectrum of **6**

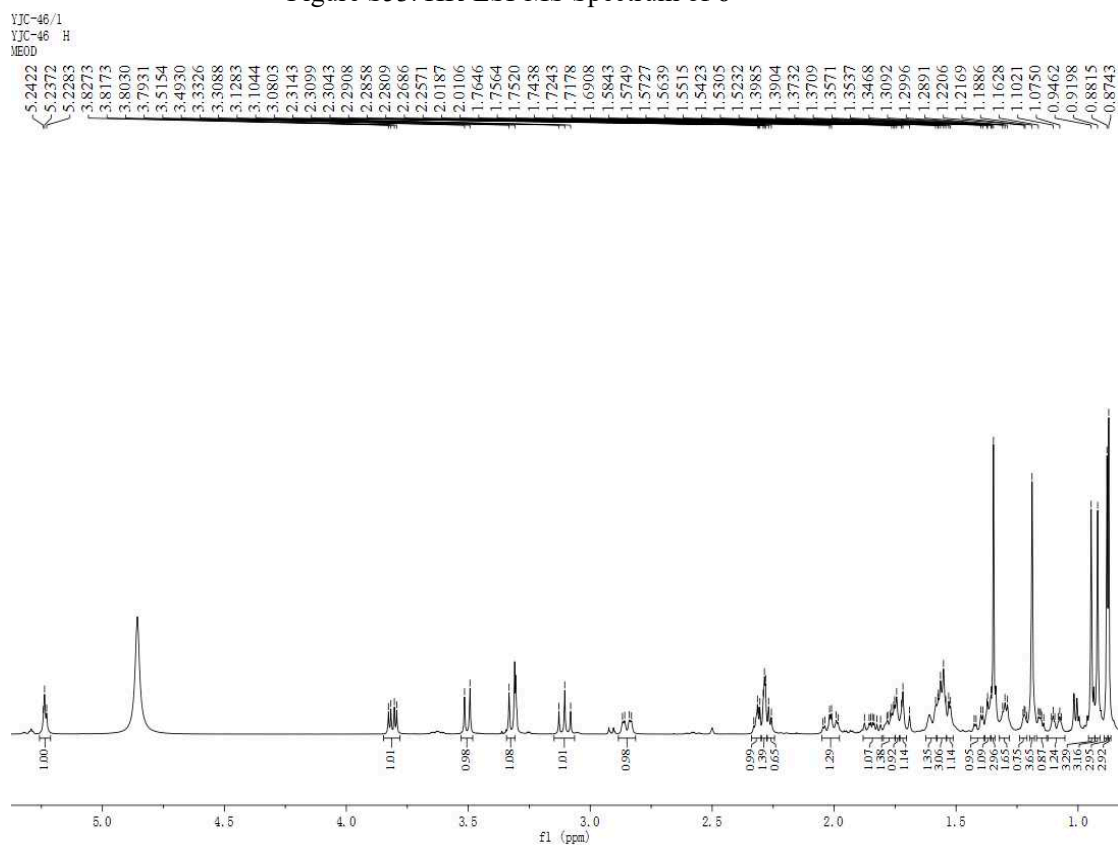

Figure S54.  $^1\text{H}$  NMR spectrum (500 MHz,  $\text{CD}_3\text{OD}$ ) of **7**

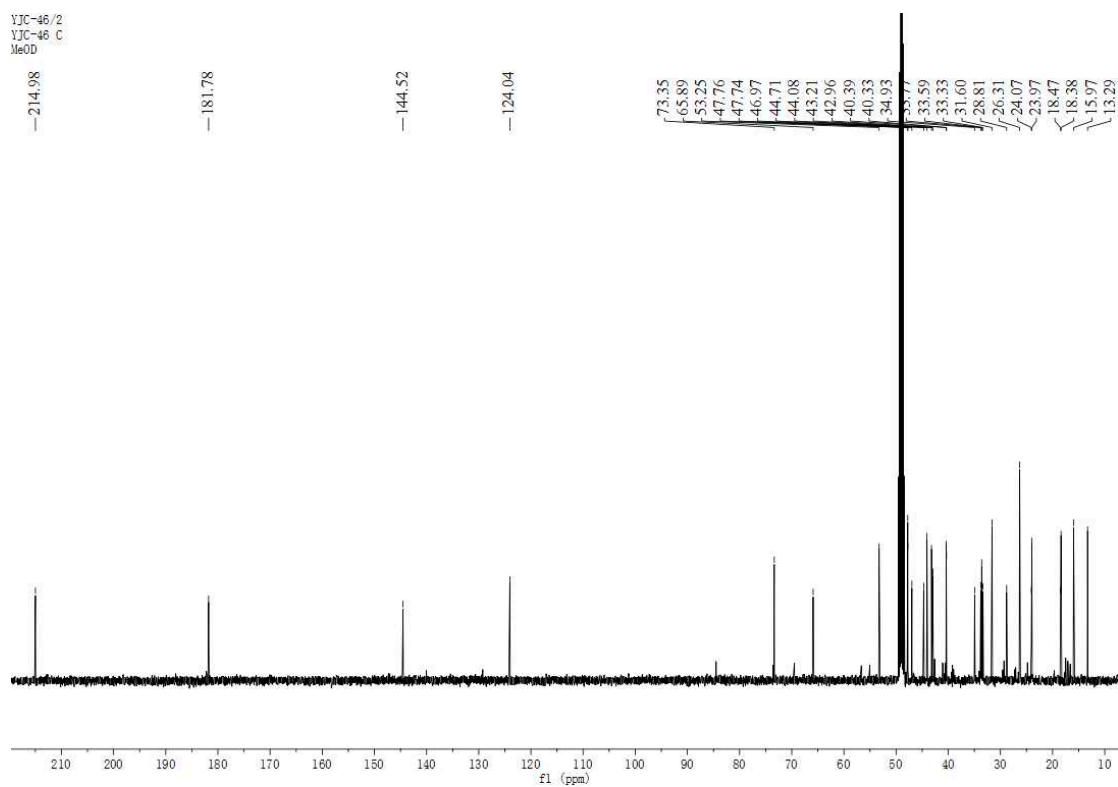

Figure S55.  $^{13}\text{C}$  NMR spectrum (125 MHz,  $\text{CD}_3\text{OD}$ ) of **7**

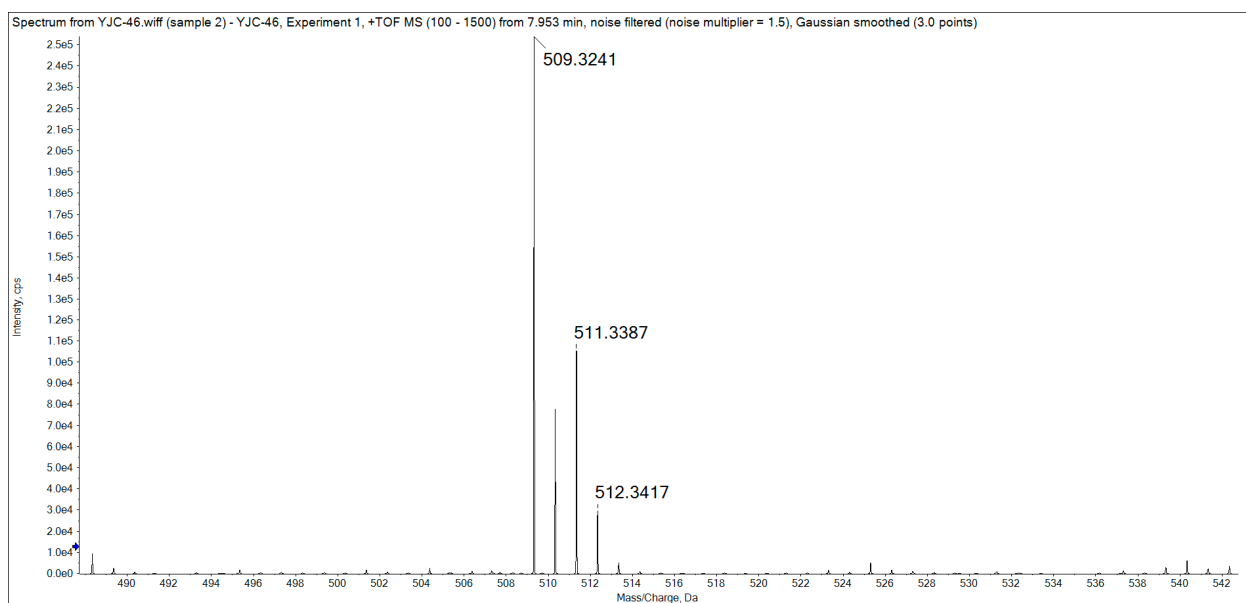

Figure S56. HR-ESI-MS Spectrum of **7**



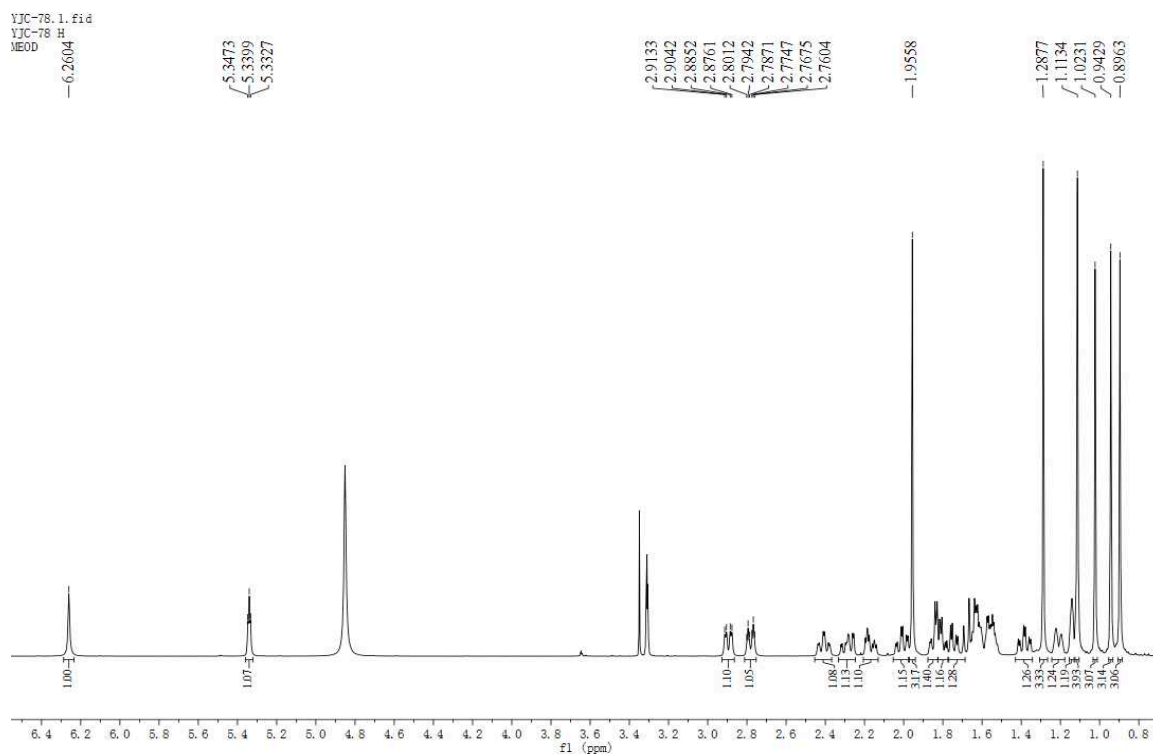

Figure S57.  $^1\text{H}$  NMR spectrum (500 MHz,  $\text{CD}_3\text{OD}$ ) of **8**

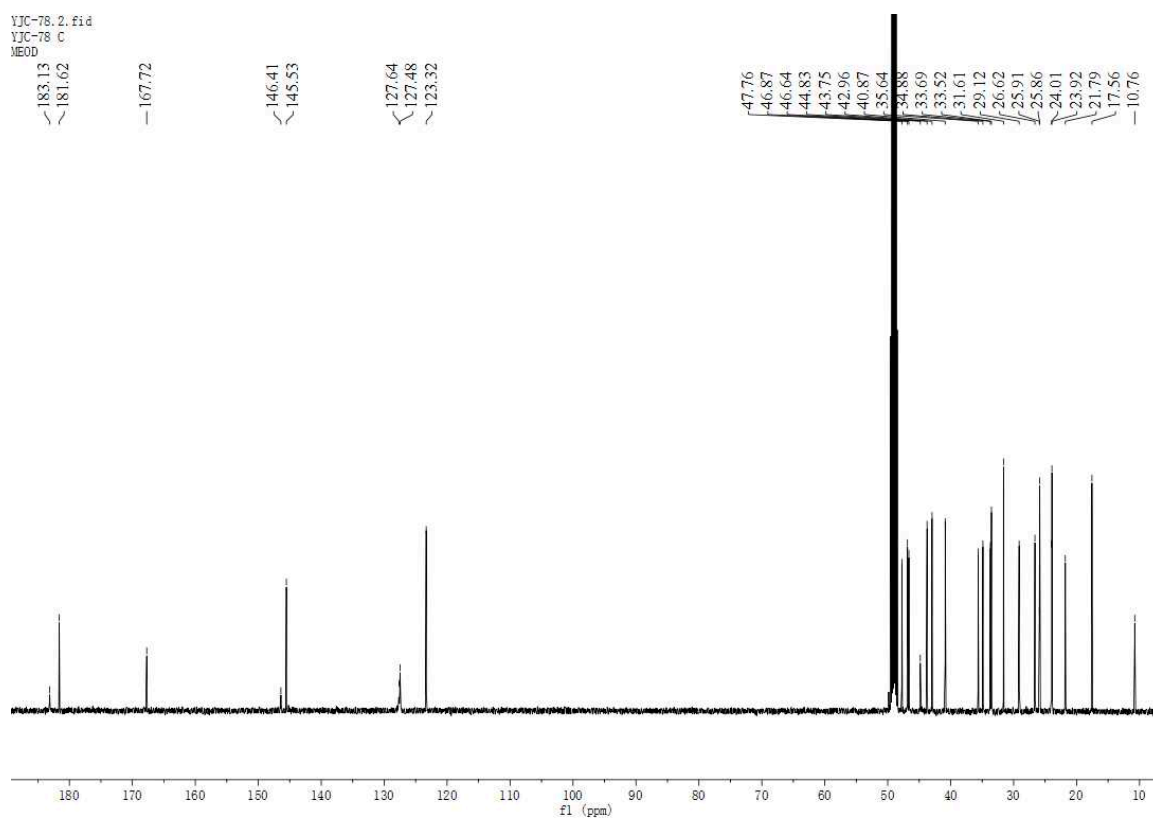

Figure S58.  $^{13}\text{C}$  NMR spectrum (125 MHz,  $\text{CD}_3\text{OD}$ ) of **8**

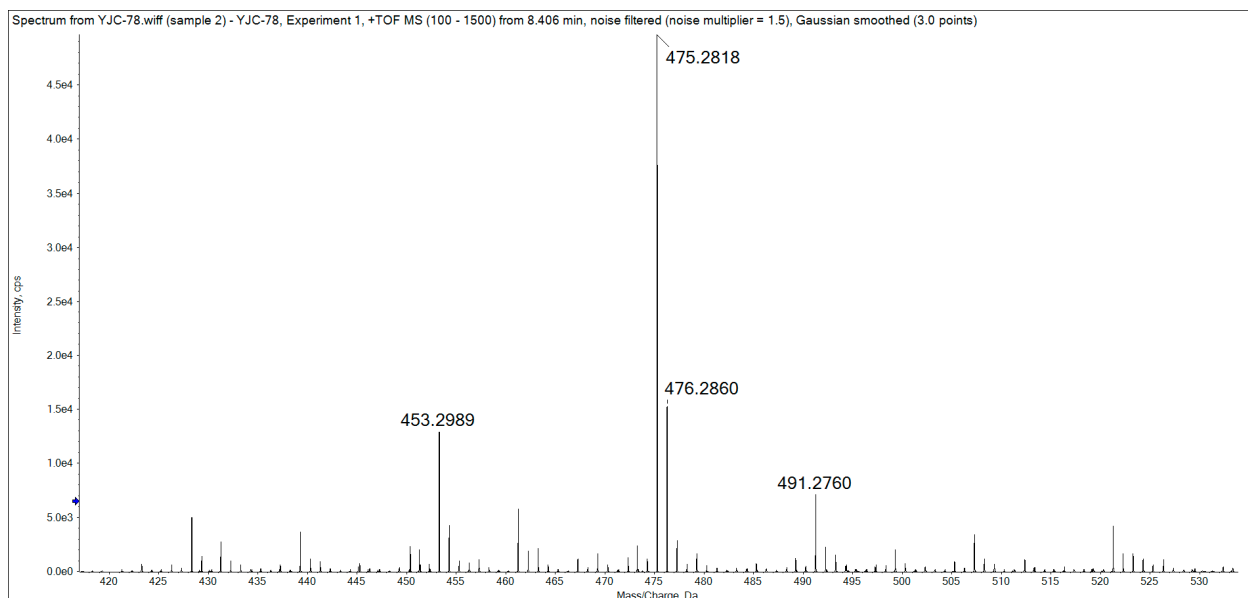

Figure S59. HR-ESI-MS Spectrum of **8**

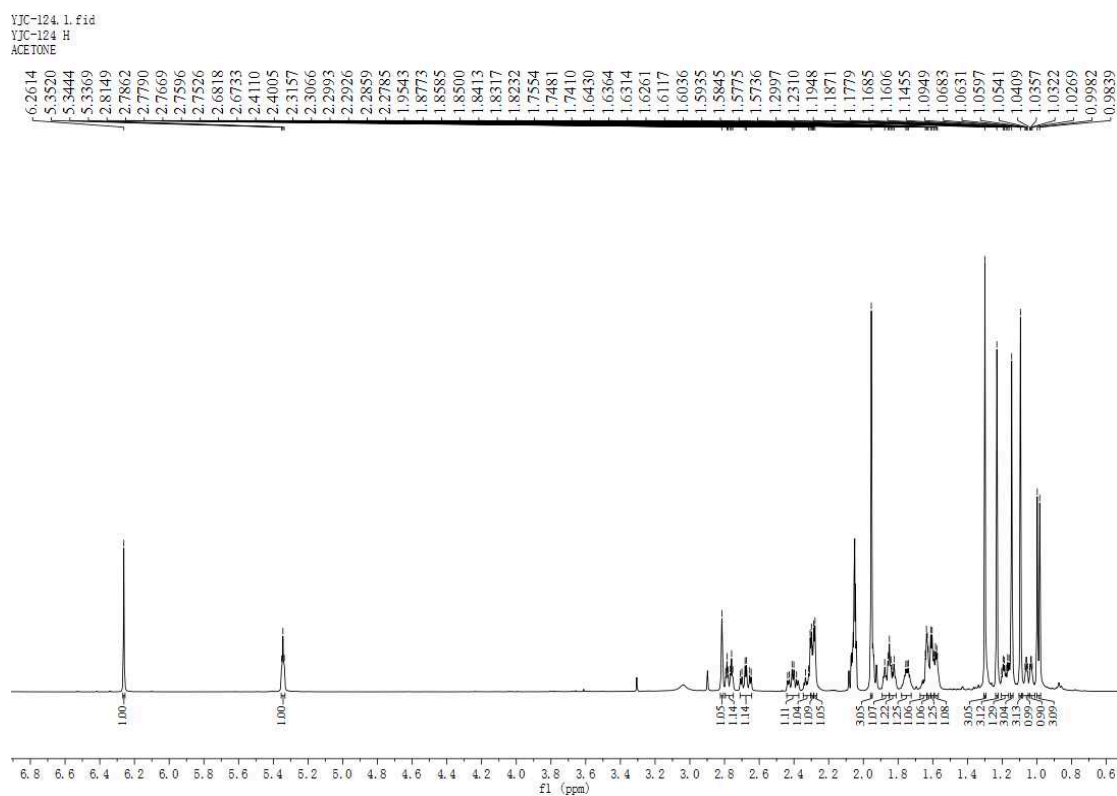

Figure S60.  $^1\text{H}$  NMR spectrum (500 MHz, Acetone- $d_6$ ) of **9**

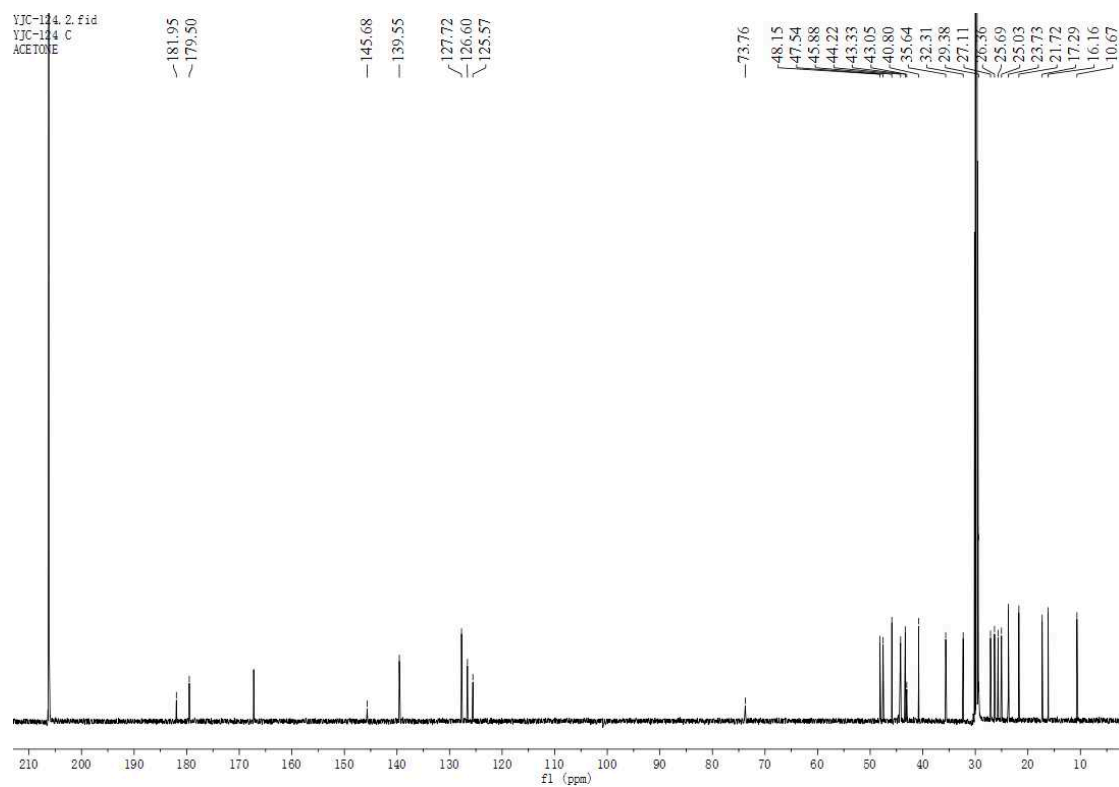

Figure S61.  $^{13}\text{C}$  NMR spectrum (125 MHz, Acetone- $d_6$ ) of **9**

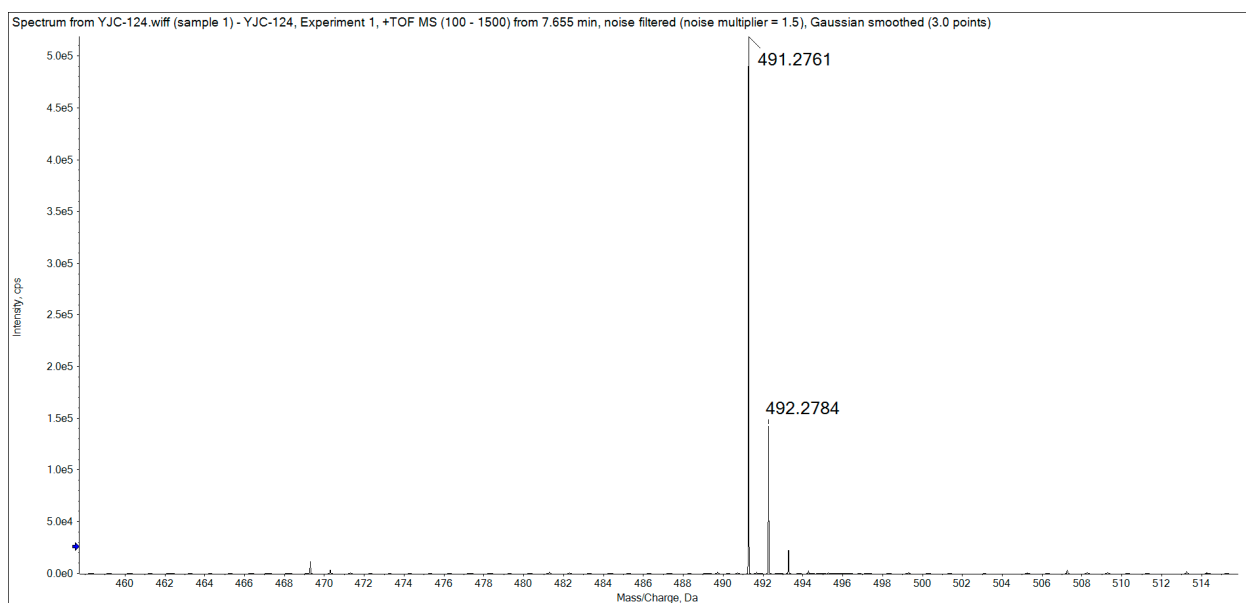

Figure S62. HR-ESI-MS Spectrum of **9**

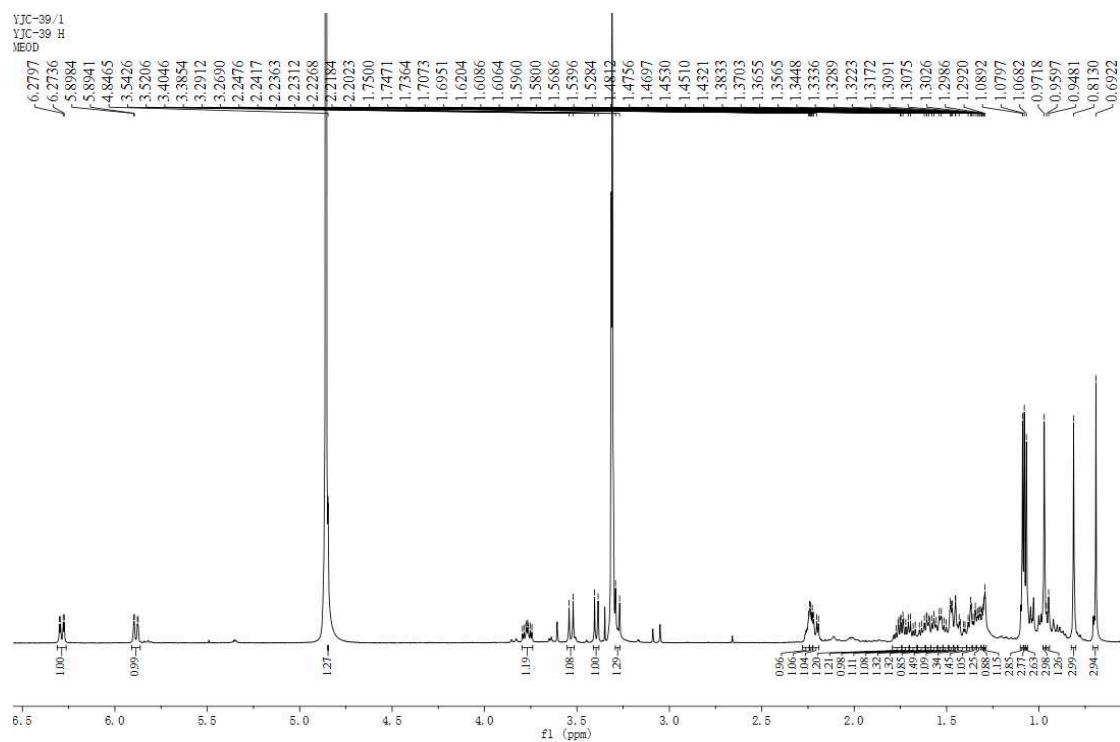

Figure S63.  $^1\text{H}$  NMR spectrum (500 MHz,  $\text{CD}_3\text{OD}$ ) of **10**

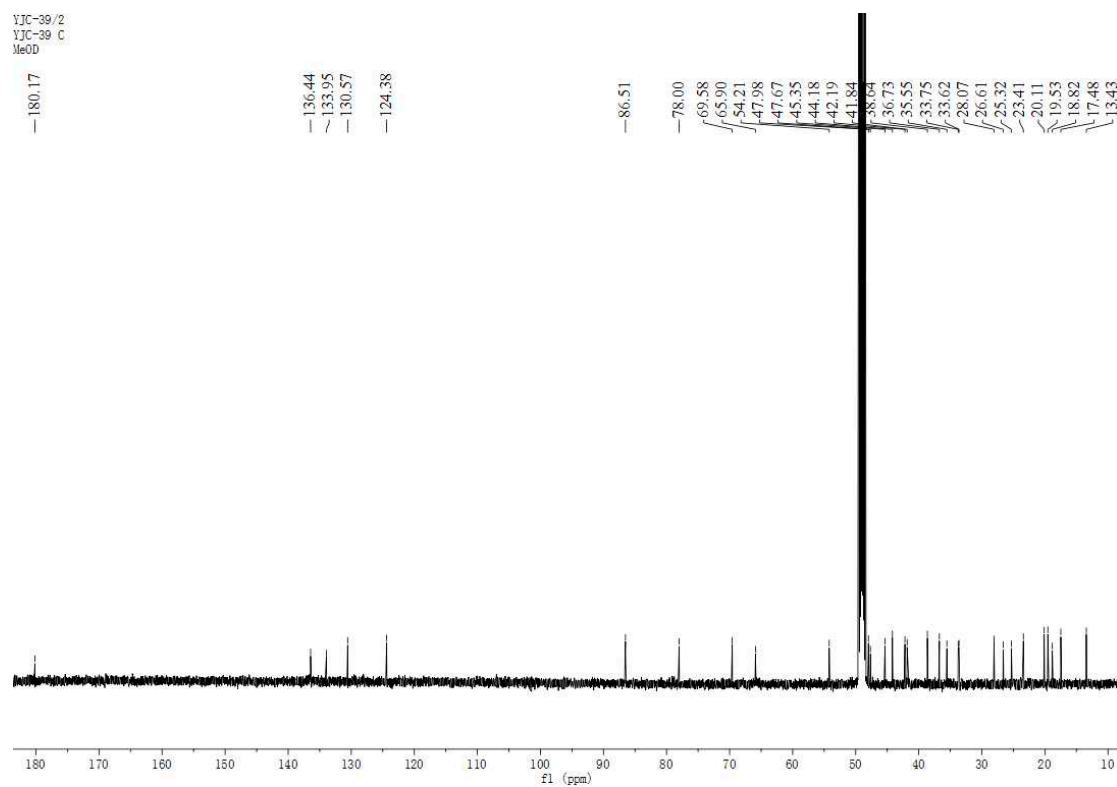

Figure S64.  $^{13}\text{C}$  NMR spectrum (125 MHz,  $\text{CD}_3\text{OD}$ ) of **10**

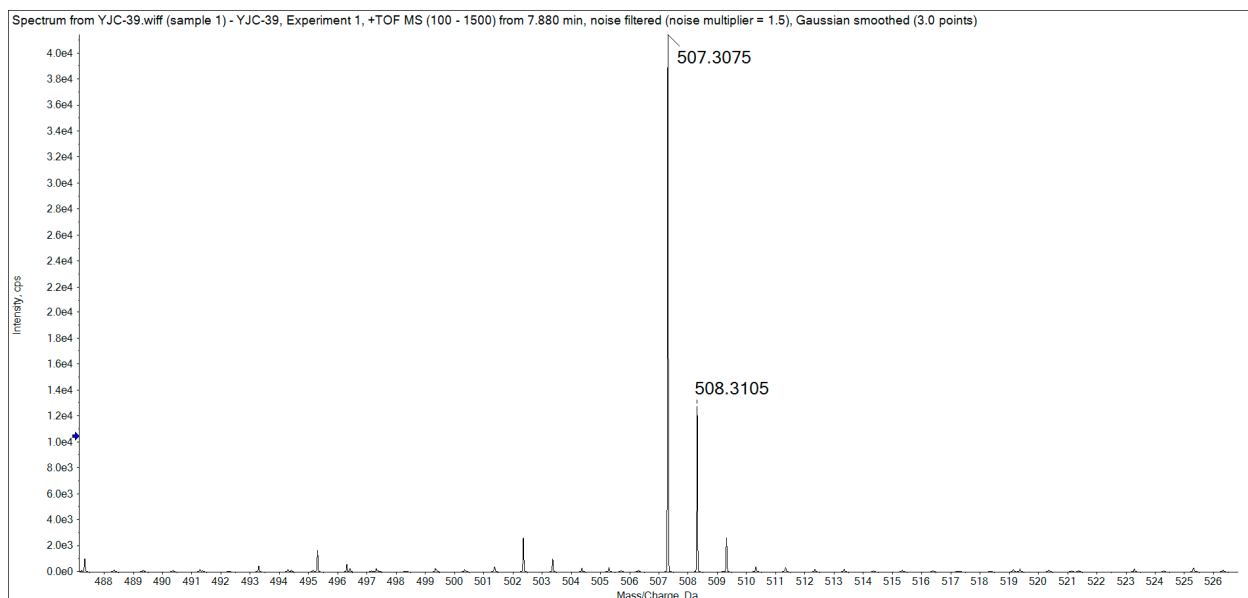

Figure S65. HR-ESI-MS Spectrum of **10**

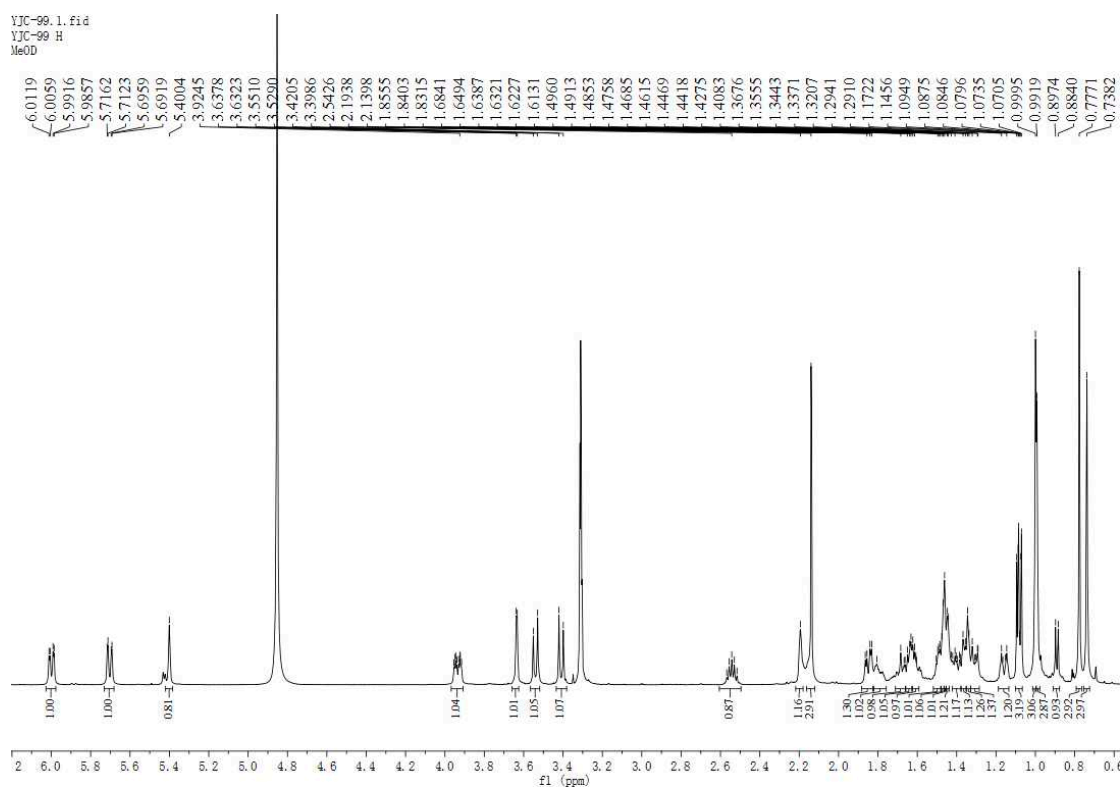

Figure S66.  $^1\text{H}$  NMR spectrum (500 MHz,  $\text{CD}_3\text{OD}$ ) of **11**

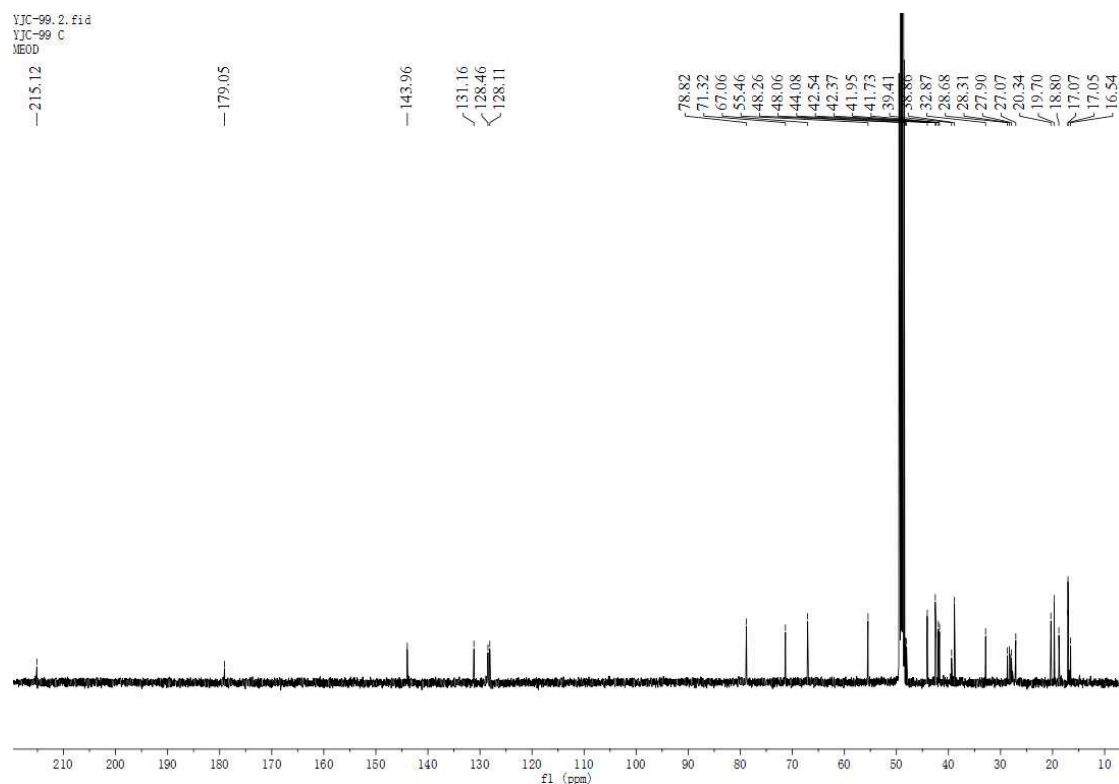

Figure S67.  $^{13}\text{C}$  NMR spectrum (125 MHz,  $\text{CD}_3\text{OD}$ ) of **11**

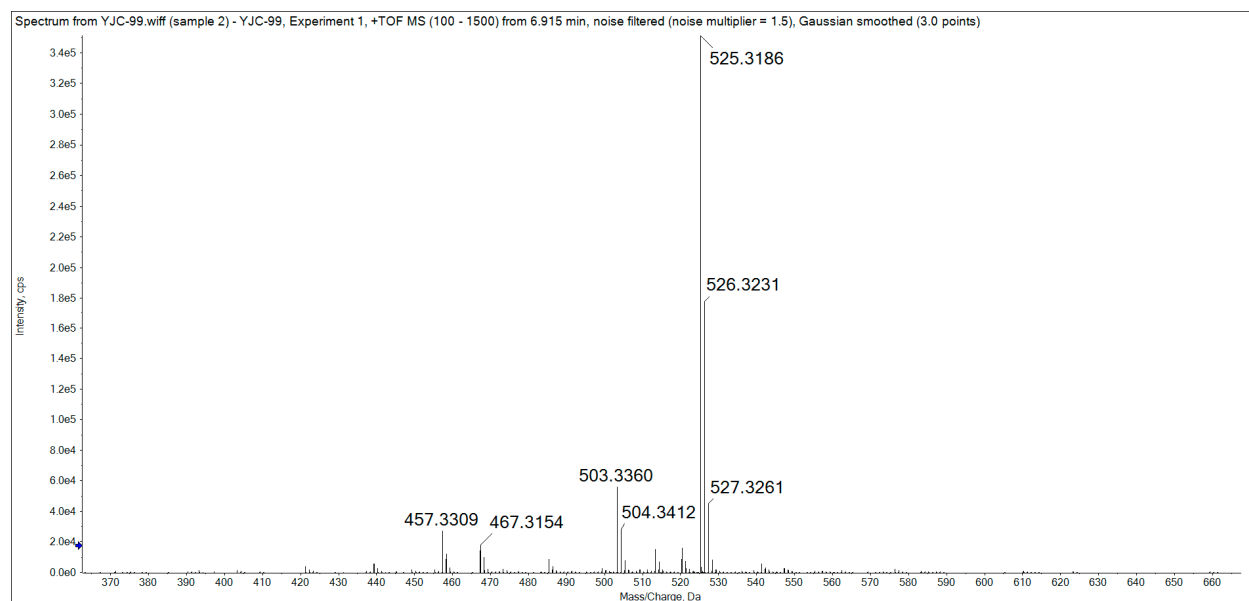

Figure S68. HR-ESI-MS Spectrum of **11**

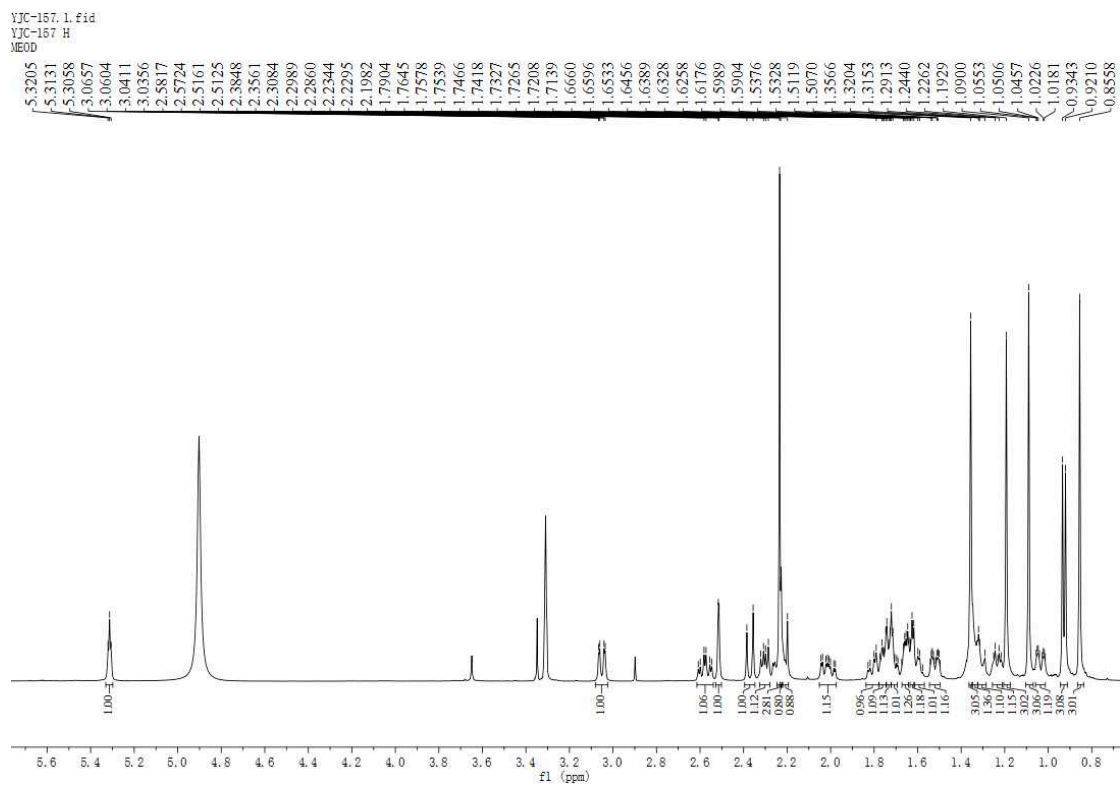

Figure S69.  $^1\text{H}$  NMR spectrum (500 MHz,  $\text{CD}_3\text{OD}$ ) of **12**

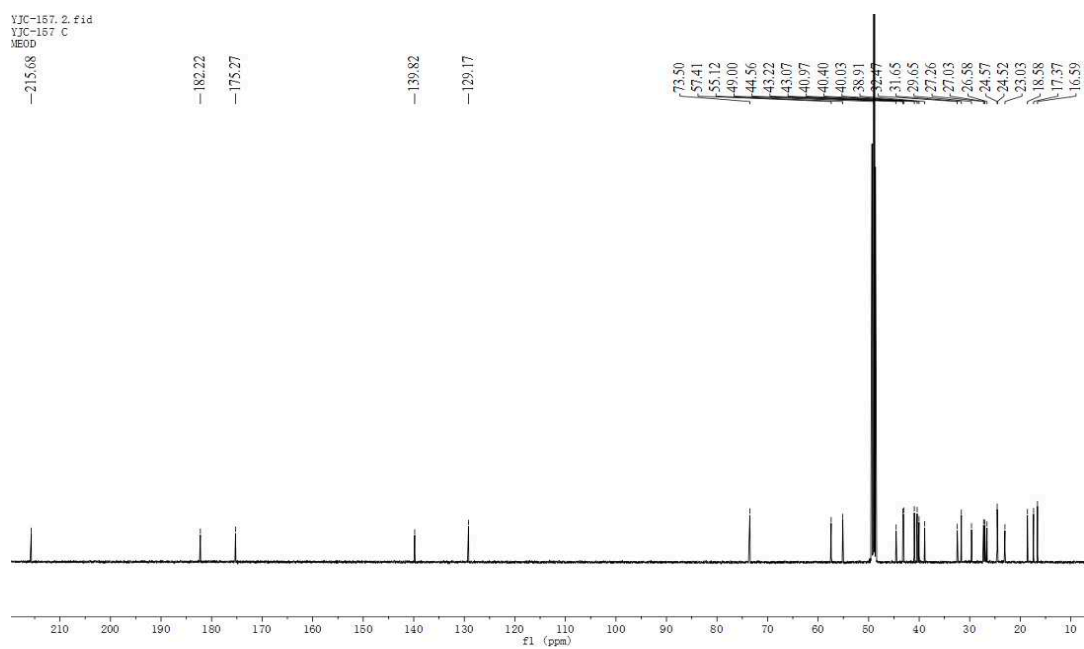

Figure S70.  $^{13}\text{C}$  NMR spectrum (125 MHz,  $\text{CD}_3\text{OD}$ ) of **12**

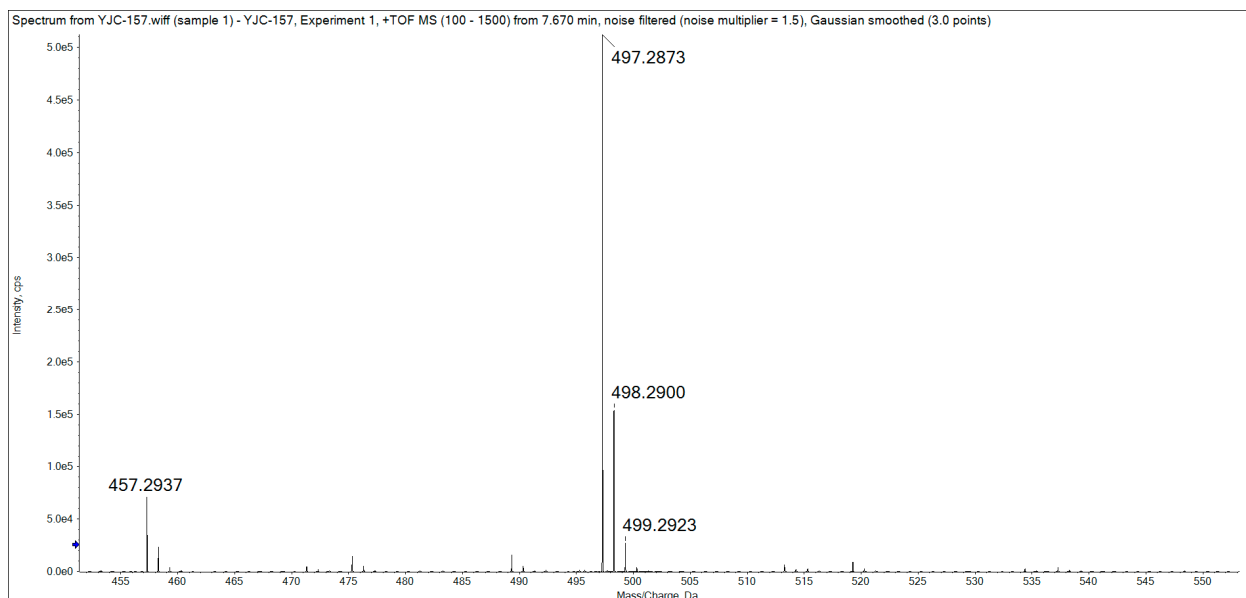

Figure S71. HR-ESI-MS Spectrum of **12**

Table 4 Melting points of compounds **6-12**

| compound | mp (°C) | Group     | mp (°C) |
|----------|---------|-----------|---------|
| <b>6</b> | 234     | <b>10</b> | 253     |
| <b>7</b> | 245     | <b>11</b> | 240     |
| <b>8</b> | 215     | <b>12</b> | 238     |
| <b>9</b> | 241     |           |         |

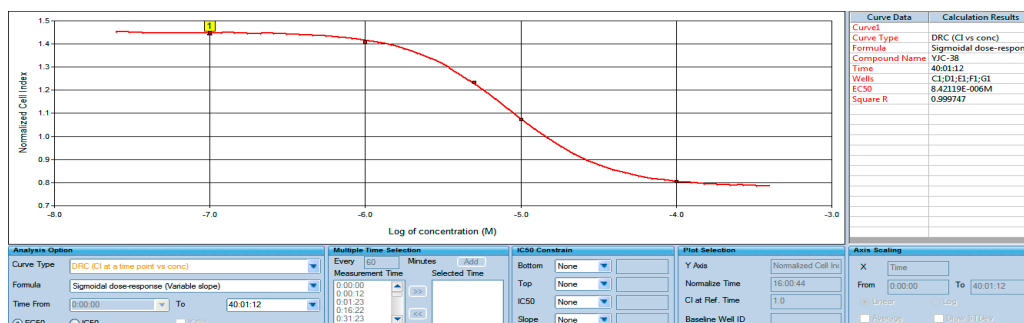

Figure S72. The curve obtained with compound **1**

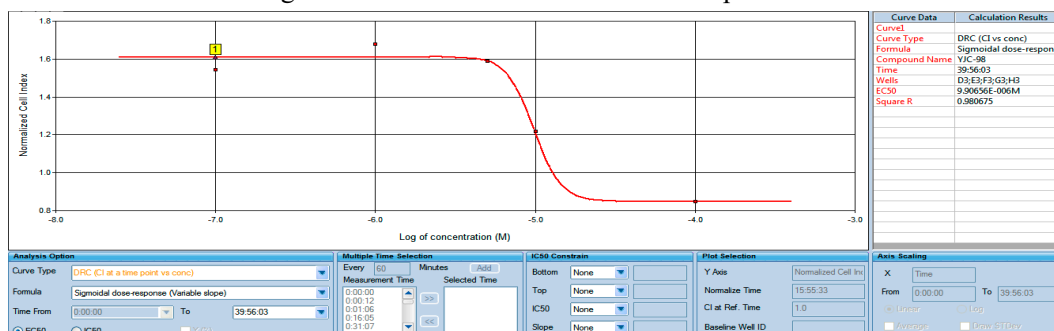

Figure S73. The curve obtained with compound **2**



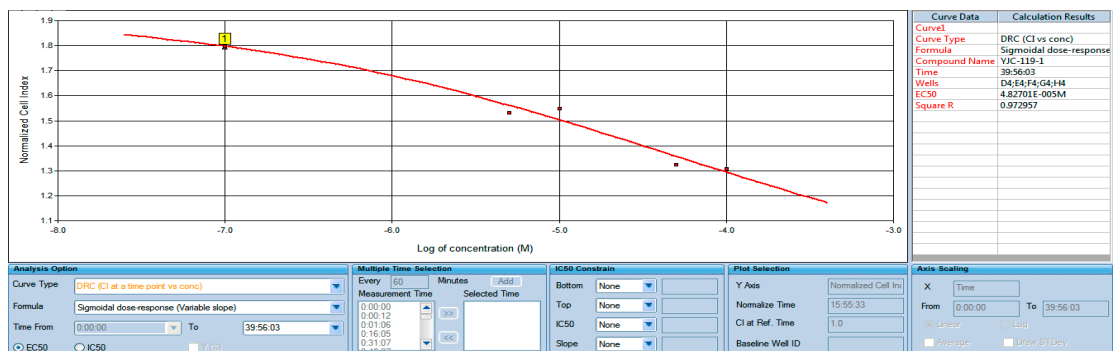

Figure S74. The curve obtained with compound 3

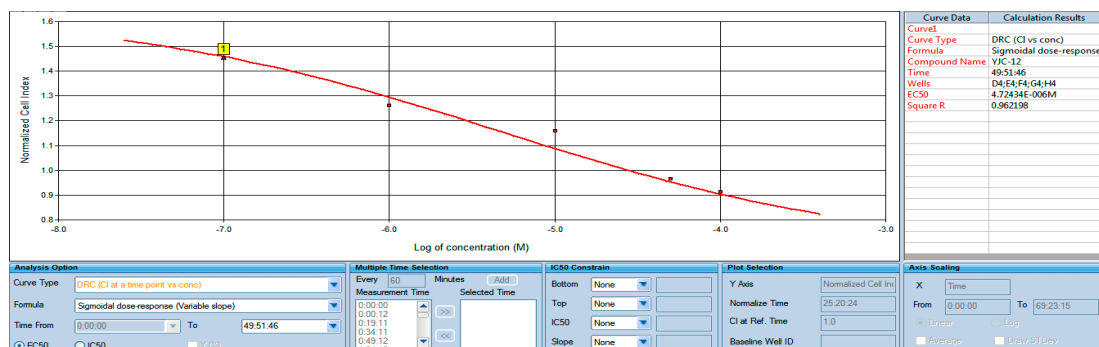

Figure S75. The curve obtained with compound 6

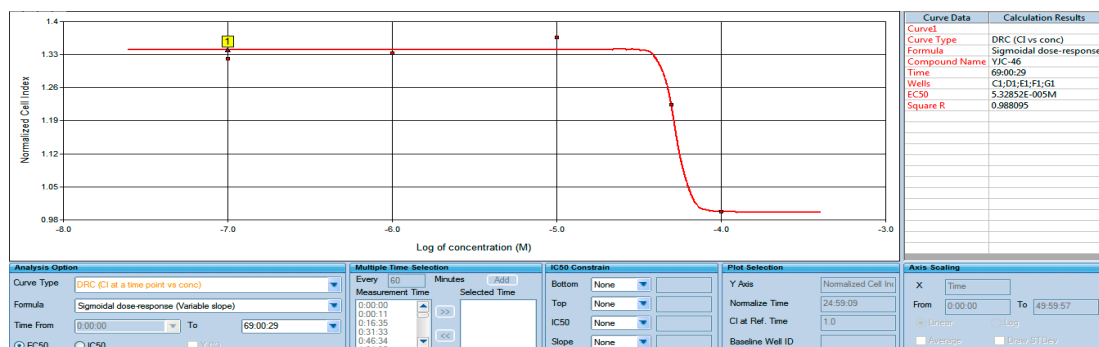

Figure S76. The curve obtained with compound 7

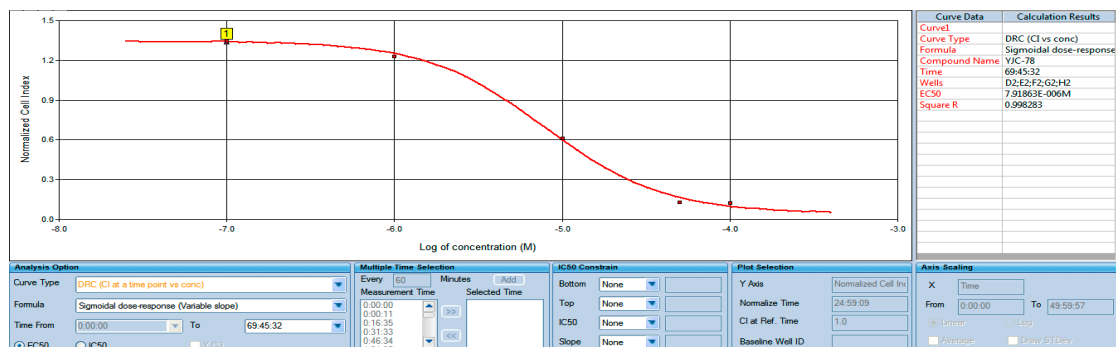

Figure S77. The curve obtained with compound 8

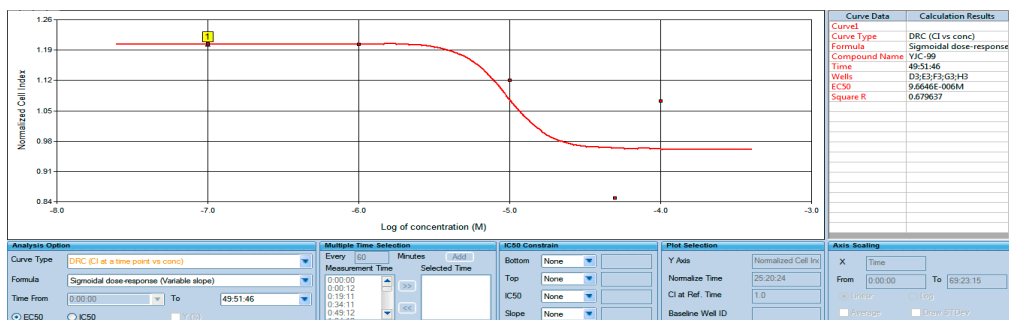

Figure S78. The curve obtained with compound 11

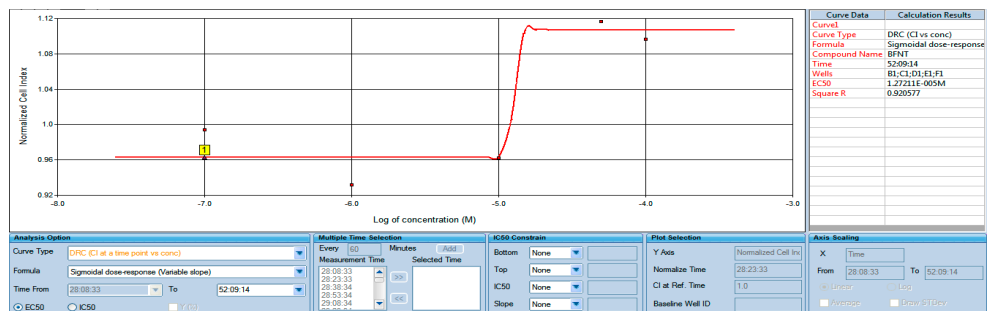

Figure S79. The curve obtained with positive control compound Pirfenidone
